1 Estimating the number of protein molecules in a plant cell: a quantitative  
2 perspective on proteostasis and amino acid homeostasis during  
3 progressive drought stress

4

5 **Björn Heinemann, Patrick Künzler, Hans-Peter Braun, and Tatjana M. Hildebrandt<sup>1</sup>**

6 Department of Plant Proteomics, Institute of Plant Genetics, Leibniz Universität Hannover,  
7 Herrenhäuser Str. 2, 30419 Hannover, Germany

8 <sup>1</sup>Address for correspondence: [hildebrandt@genetik.uni-hannover.de](mailto:hildebrandt@genetik.uni-hannover.de)

9 The author responsible for distribution of materials integral to the findings presented in this  
10 article in accordance with the policy described in the Instructions for Authors ([www.plantcell.org](http://www.plantcell.org))  
11 is: Tatjana M. Hildebrandt ([hildebrandt@genetik.uni-hannover.de](mailto:hildebrandt@genetik.uni-hannover.de))

12

13 SHORT TITEL: Protein and amino acid homeostasis during drought

14

15

16

17

18

19

20

21

22

23

24

25

26

27

28

29

30

## 31 **Abstract**

32 During dehydration cellular proteostasis as well as amino acid homeostasis are severely  
33 challenged, since the decrease in photosynthesis induces massive proteolysis. Thus, we  
34 selected progressive drought stress in *Arabidopsis thaliana* as a model to investigate the  
35 balance between protein and free amino acid homeostasis on a quantitative level. We  
36 analyze the mass protein composition of rosette leaves and estimate, how many protein  
37 molecules are present in a plant cell and its subcellular compartments. Under control  
38 conditions, an average *Arabidopsis* mesophyll cell contains about 25 billion protein  
39 molecules and 80% of them are localized in the chloroplasts. Severe water deficiency  
40 leads to degradation of more than 40% of the leaf proteome and thus causes a drastic  
41 shift towards the free amino acid pool. Stress induced proteolysis of half of the 400  
42 million RubisCO hexadecamers present in the chloroplasts of an individual mesophyll  
43 cell alone doubles the cellular content in free amino acids. A major fraction of the amino  
44 acids released from proteins is channeled into the synthesis of proline as a compatible  
45 osmolyte. Complete oxidation of the remaining part as an alternative respiratory  
46 substrate can fully compensate the lack of carbohydrates derived from photosynthesis  
47 for several hours.

## 48 **Introduction**

49 Proteostasis (protein homeostasis) is essential for maintaining normal cellular functions,  
50 which rely on an appropriate composition as well as correct folding of the proteome.  
51 Plant cells contain several thousand different proteins that are highly diverse not only in  
52 terms of their function but also in size and abundance. RubisCO has to be present in  
53 large quantities in leaf cells due to its low enzymatic activity and carbon fixation  
54 efficiency, whereas hardly detectable amounts of e.g. signaling molecules or  
55 transcription factors are sufficient to fulfil their function. The protein composition of other  
56 tissues such as roots or seeds again is completely different (Baerenfaller et al. 2008,  
57 Mergner et al. 2020). In addition, 1 mg of a large protein such as glutamate synthase  
58 contains only 4 nmol active sites compared to 83 nmol for the small protein glutaredoxin.  
59 Thus, the investment of resources (energy and nutrients) required for the synthesis of

60 large and/or high abundant proteins is by several magnitudes higher than for small  
61 proteins of low abundance.

62 Not surprisingly, cells contain several sophisticated systems to control proteostasis and  
63 recycle the resources needed for new growth. Protein synthesis is catalyzed by the  
64 ribosomes in the cytosol, plastids, and mitochondria. The synthesis rate is regulated on  
65 different levels in response to the energy status of the cell, e.g. via mRNA availability,  
66 the GDP and GTP pools, and posttranslational modification of the ribosome (Merchante  
67 et al. 2017). The two major protein recycling systems in eukaryotes are autophagy and  
68 the ubiquitin-proteasome system (reviewed by Dikic 2017, Marshall and Vierstra 2018,  
69 Vierstra 2009). During autophagy cytoplasmic constituents including large protein and  
70 nucleic acid aggregates, lipid bodies, and even entire organelles are sequestered into a  
71 double membrane vesicle, the autophagosome, and delivered to the vacuole for  
72 breakdown. Thus, autophagy in addition to proteins also digests nucleic acids, lipids,  
73 and carbohydrates. Autophagosome formation is controlled by a highly conserved set of  
74 40 autophagy-related (ATG) proteins. They include receptors that recognize specific  
75 cellular components and tether them to the enveloping autophagic membrane to target  
76 them for destruction. In contrast, the ubiquitin-proteasome system localized in the  
77 cytosol catabolizes proteins individually. Substrates are marked for degradation by a  
78 poly ubiquitin tag that enables their recognition and hydrolysis by the proteasome, a  
79 large protein complex composed of a 20S catalytic core and two regulatory 19S lids.  
80 Several molecules of the 8.5 kDa protein ubiquitin are covalently conjugated to a lysine  
81 residue of the substrate protein by an enzymatic cascade consisting of ubiquitin  
82 activating (E1), conjugating (E2), and ligating (E3) enzymes. Substrate specificity is  
83 provided by a high number of different E3 ubiquitin ligases (>1,400 in the Arabidopsis  
84 genome). In addition to the bulk degradation systems plants contain hundreds of  
85 individual proteases from several unrelated families. They can be grouped into four  
86 major classes according to the nature of the nucleophile used for proteolytic cleavage of  
87 the peptide bond. Cysteine and serine proteases use a Cys or Ser activated by His as a  
88 nucleophile whereas metalloproteases and aspartic proteases activate water using a  
89 metal ion or Asp, respectively (van der Hoorn, 2008). Proteases are present in all the  
90 different subcellular compartments. Plastids and mitochondria contain distinctive

91 proteolytic systems from prokaryotic origin such as AAA-class, Lon, FtSH and Clp  
92 proteases (Nishimura et al. 2016; Kwasniak et al. 2012).

93 The accumulation of non-functional and misfolded proteins would lead to the formation  
94 of large protein aggregates that are detrimental to cellular function (McClellan et al.  
95 2005). Thus, damaged proteins are efficiently detected and eliminated by the two main  
96 protein quality control systems, the ubiquitin-proteasome system and autophagy, to  
97 avoid proteotoxic stress (Dikic 2017). Even under steady state conditions the turnover  
98 rates of individual proteins are highly diverse, a more than 150-fold variation in protein  
99 degradation has been reported (Li et al. 2017). The D1 protein localized in the reaction  
100 center of photosystem II is replaced on a daily basis since it is frequently damaged by  
101 reactive oxygen species as a result of photosynthetic activity. Also, regulatory proteins  
102 such as hormone response factors usually have a short half-life to allow rapid responses  
103 to a changing environment (Nelson and Millar 2015). In contrast, ribosomal subunits are  
104 among the most stable proteins in Arabidopsis and remain functional for several months  
105 (Li et al. 2017). Protein stability is defined by different factors such as the physical  
106 location of the protein, interactions with cofactors or other proteins, and post-  
107 translational modifications (Nelson and Millar 2015).

108 Proteostasis is closely connected to amino acid homeostasis since protein synthesis  
109 requires sufficient supply of loaded t-RNAs whereas proteolysis releases free amino  
110 acids. The effect of protein metabolism on the relative contents of free amino acids can  
111 be substantial in particular for low abundant amino acids such as the sulfur containing,  
112 aromatic, and branched chain amino acids (Hildebrandt 2018). In yeast and animal cells  
113 proteasome inhibition leads to cell death, which is primarily caused not by the  
114 accumulation of misfolded proteins but by a detrimental deficiency in free amino acids  
115 (Suraweera et al. 2012). Apart from serving as building blocks for proteins free amino  
116 acids have several additional functions in plant metabolism. They are precursors for the  
117 synthesis of secondary metabolites, hormones and signaling molecules, and also act as  
118 transport and storage forms for organic nitrogen (Alcázar et al. 2006; Lam et al. 2003;  
119 Tzin and Galili 2010). During drought and salt stress Pro and the non-protein amino acid  
120  $\gamma$ -aminobutyric acid (GABA) function as compatible osmolytes (Krasensky and Jonak  
121 2012). Proteolysis is increased in response to adverse environmental conditions to



122 provide amino acids as precursors for these defense related metabolites and also as  
123 alternative substrates for ATP production when photosynthesis rates are low (Araujo et  
124 al. 2011; Hildebrandt et al. 2015). In the present study we use progressive drought  
125 stress in Arabidopsis as a model to investigate the balance between protein and free  
126 amino acid homeostasis on a quantitative level. We estimate the molecular as well as  
127 the mass protein composition of an average rosette leaf and an individual mesophyll  
128 cell. How many protein molecules are present in a plant cell and its subcellular  
129 compartments? Which fraction of their leaf proteome do plants degrade maximally under  
130 severe drought stress? How is proteostasis controlled under these conditions? Do cells  
131 just eat anything when they are really starved or are they still picky? Are the proteins  
132 that are essential for stress resistance synthesized or rather spared from degradation?  
133 Which proteins contribute to the free amino acid pool and what happens to the amino  
134 acids released during proteolysis?

135

## 136 **Results**

### 137 **Quantitative composition of the leaf proteome**

138 As a starting point for investigating protein homeostasis during drought stress we  
139 focused on the proteome of control plants grown under optimal conditions to provide an  
140 impression of the status quo (Fig. 1A). Intensity-based absolute quantification (iBAQ,  
141 Schwanhäusser et al. 2011) was used for calculating the absolute content [ $\mu\text{g protein} \cdot$   
142  $\text{g}^{-1}$  DW] of each of the 1399 different proteins detected by our shotgun-mass  
143 spectrometry approach. The complete MS dataset as well as detailed information on the  
144 calculation methods can be found in the supplemental information (Supp. Dataset S1,  
145 Supp. Fig. S1). The leaf proteome is dominated by a limited number of very high  
146 abundant proteins (Fig. 1B). RubisCO alone, which is well known for being one of the  
147 most abundant proteins on earth (Bar-On and Milo 2019), constitutes nearly one fourth  
148 of the leaf protein mass, corresponding to  $26 \text{ mg} \cdot \text{g}^{-1}$  DW under control conditions  
149 (Supp. Dataset S1). Another fourth consists of eleven exclusively photosynthetic  
150 proteins, and in total about 80 % of the leaf protein mass can be found in the  
151 chloroplasts (Fig. 1C, top). Without taking absolute quantities into account, the

152 distribution of the proteins detected by MS on subcellular compartments looks markedly  
153 different, with only 37 % chloroplast protein species (Fig. 1C, bottom). The protein  
154 investment of a leaf cell into different functions can be visualized on a PROTEOmap  
155 (Fig. 1D, Liebermeister et al. 2014). Under control conditions the major part of the leaf  
156 protein mass (66 %) is dedicated to photosynthesis, followed by protein metabolism (7.5  
157 %) and amino acid metabolism (6 %).

158 We used two different approaches to estimate, how many protein molecules are actually  
159 present in a plant cell based on cell number and cell size, respectively (Supp. Fig. S1,  
160 see also discussion). Both calculations consistently revealed that an average mesophyll  
161 cell in a mature Arabidopsis leaf contains about 25 billion protein molecules (Fig. 1E). 20  
162 billion of them are localized in the chloroplasts, 3.1 billion in the cytosol, and 0.5 billion in  
163 the mitochondria. The margin of copy numbers ranges from 3.8 billion molecules of  
164 RubisCO large subunit to 2435 acetyl-CoA carboxylase 1 molecules, which is the  
165 detection limit of our MS approach. Thus, an average Arabidopsis leaf mesophyll cell  
166 contains about 400 million RubisCO hexadecamers under optimal growth conditions.

### 167 **Severe drought stress leads to massive proteolysis**

168 We carefully established an experimental setup that mimicked physiological drought  
169 stress conditions as closely as possible and at the same time led to a highly  
170 reproducible stress phenotype (Fig. 2, a detailed description of the drought treatment is  
171 given in the methods section). Shortly, plants were grown under long-day control  
172 conditions for two weeks and watered to the same level. The dehydration process was  
173 then monitored on a daily basis and leaf samples were taken at different time points  
174 during the desiccation process from beginning to moderate and severe drought stress  
175 until recovery was no longer possible. Rosette growth gradually declined and stopped  
176 after 10 days without water (Fig. 2C). We defined this time point as stress level S1 and  
177 numbered the following days of progressive drought stress consecutively. First  
178 indications of a loss in leaf turgor became visible in some of the plants after 12 days  
179 without water (S3) and complete wilting until death occurred within the following 72  
180 hours. These late stages of severe drought stress (S4-S7) were classified according to  
181 their leaf phenotype: Number of rolled leaves, relative water content, and potential to  
182 recover after re-watering. The leaf protein content remained stable ( $109 \pm 13 \text{ mg} \cdot \text{g}^{-1}$ )

183 DW) during the first 12 days without watering (S1-S3), but then rapidly decreased by 39  
184 % within 24 hours (S5).

185

## 186 **Relative vs. absolute protein quantification during progressive drought stress**

187 Four stress levels were selected for leaf proteome analysis by shotgun mass  
188 spectrometry (Fig 3A, Supp. Dataset S1, Supp. Fig. S2): control (relative water content  
189 (RWC) =  $88 \pm 5$  %), S3 (moderate stress, no wilting, RWC =  $69 \pm 5$  %), S5 (severe  
190 stress, RWC =  $55 \pm 7$  %), S6 (maximum tolerable stress, RWC =  $22 \pm 5$  %). Changes in  
191 the relative abundance of individual proteins were estimated via label-free quantification  
192 (LFQ) (Fig. 3B; Cox et al. 2014). This approach is suitable for identifying proteins that  
193 are induced and thus might be particularly relevant during the conditions tested.  
194 Considering the fact that plants degrade almost half of their leaf protein content during  
195 severe drought stress (Fig. 3A) it is especially important to be aware of absolute  
196 contents of the individual proteins in the leaves as well, which we calculated using iBAQ  
197 values (Fig. 3C). A combination of both data evaluation methods makes it possible to  
198 discriminate between proteins that actually increase in their absolute content even after  
199 massive proteolysis (Fig. 3B, red squares), in contrast to others that decrease less than  
200 average and as a consequence also are of higher relative abundance in the stressed  
201 plant (Fig. 3B, blue squares in the right half of the volcano plots).

## 202 **Patterns of stress-induced proteome changes in subcellular compartments**

203 To provide a first impression of quantitative changes in the leaf proteome during  
204 progressive drought stress we sorted all detected proteins according to their absolute  
205 content under control conditions for each compartment individually. The contents of  
206 each individual protein during progressive drought stress were then plotted in  
207 superimposing graphs (Fig. 4A). The fraction of proteins degraded in the course of the  
208 stress treatment becomes visible as green or orange area. Interestingly, there are clear  
209 differences between the compartments. A large fraction of proteins localized in  
210 chloroplasts, the cytosol, the plasma membrane, or the golgi apparatus seems to be  
211 subject to bulk degradation. In contrast, hardly any green areas are visible for  
212 mitochondrial and extracellular proteins indicating a lower degradation rate. In order to

213 quantify this observation we calculated fold change ratios of individual protein contents  
214 in stressed vs. control plants and sorted them in ascending order for each stress level  
215 individually (Fig. 4B). Proteins with an average degradation rate are localized at 0.94 for  
216 stress level S3, at 0.61 for S5, and at 0.58 at S6, corresponding to the decrease in total  
217 protein content. In the complete dataset and also in the subsets of plastid and cytosolic  
218 proteins there is a large area with almost horizontal lines representing proteins with  
219 roughly average degradation rates. In contrast, the slopes of the mitochondrial and  
220 extracellular graphs are much steeper and only 11-12 % of the proteins show average or  
221 increased degradation rates in severely stressed plants (Fig. 4B, vertical red lines).

## 222 **Regulation of protein abundance via synthesis and degradation**

223 Protein abundance can be regulated at the level of synthesis and/or degradation. We  
224 used genevestigator (Hruz et al. 2008) to estimate gene expression levels during  
225 drought stress and combined this information with the relative protein abundances  
226 detected by our proteomics approach (Supp. Dataset S2). We filtered the proteomics  
227 dataset for proteins of consistently increased abundance and divided the resulting list of  
228 332 proteins in two subgroups: Group I contained the proteins with significantly  
229 increased expression levels (88 proteins) and group II contained proteins with  
230 decreased or unaffected expression levels (244 proteins), indicating that regulation  
231 might rather be achieved at a posttranscriptional level, e.g. via decreased proteolysis  
232 (Fig. 5). In order to estimate, which metabolic pathways might preferentially be regulated  
233 by these strategies we compared the fraction of proteins attributed to a specific pathway  
234 in each regulation group to the complete MS dataset (Table 1). The proteins up-  
235 regulated via gene expression (group I) were mainly involved in protein, lipid or amino  
236 acid degradation, stress response and secondary metabolism. Energy metabolism  
237 (glycolysis and respiratory chain) and extracellular proteins required for cell wall  
238 metabolism and proteolysis were prevalent in group II and thus might be regulated by  
239 decreased degradation rates. The proteins of consistently decreased relative abundance  
240 (255 proteins) were also subdivided in those with decreased expression rates (group III,  
241 78 proteins) and those with increased or unaffected expression rates (group IV, 177  
242 proteins) (Fig 5, lower part). Group III (down-regulation on expression level) contains  
243 specific vacuolar proteins and enzymes catalyzing lipid or tetrapyrrole synthesis (Table

244 1). No particular enrichment in subcellular compartments or functional categories was  
245 detected for proteins potentially down-regulated by increased proteolysis (group IV).

246  
247 **Adaptations of the protein synthesis and degradation machineries during**  
248 **progressive drought stress**

249 Under control conditions about 5.4 % of the leaf proteome detected by our MS approach  
250 is dedicated to protein synthesis (ribosomal proteins, translation initiation and elongation  
251 factors) compared to 1.4 % involved in proteolysis (proteasomes, autophagy proteins,  
252 proteases and regulatory proteins) (Fig. 6A). During progressive drought stress a  
253 majority of the proteins involved in protein synthesis (ca. 75 %) decreased more than  
254 average (Fig. 6B). In particular, the large group of ribosomal proteins (125 proteins,  
255 contributing  $3.3 \text{ mg protein} \cdot \text{g}^{-1} \text{ DW}$  under control conditions) had strikingly homogenous  
256 degradation rates (mass ratio S6/C =  $0.49 \pm 0.17$ ). In contrast, the total leaf content of  
257 proteolytic enzymes remained stable ( $0.8\text{-}0.9 \text{ mg protein} \cdot \text{g}^{-1} \text{ DW}$ ) but changed  
258 drastically in its composition. Protease copy numbers in the cytosol, the vacuole, and in  
259 the apoplast increased progressively (Fig. 7A), and after severe stress most of the  
260 vacuolar and extracellular proteases were of significantly increased abundance  
261 compared to control conditions indicating their specific relevance for drought response  
262 (Fig. 7B). In order to estimate the mean workload of the proteolytic system in the  
263 individual subcellular compartments, we calculated the number of proteases per 1000  
264 protein molecules (Fig. 7C). The relative abundance of proteases per substrate was at  
265 least ten fold higher in the apoplast than in any other compartment even under control  
266 conditions and further increased already during moderate stress (S3). Vacuolar  
267 proteases strongly accumulated during severe stress and also in the cytosol plus  
268 nucleus the relative capacity of proteases approximately doubled, although only a  
269 specific subset of proteolytic enzymes was significantly increased. Due to their high  
270 abundance chloroplasts contained the major fraction of cellular proteases in the leaves  
271 of non-stressed plants (Fig. 7A). However, proteases constituted less than 0.5 % of all  
272 plastid proteins (compared to 9-13 % in the apoplast) and decreased during stress to a  
273 similar extent as the majority of chloroplast proteins (Fig. 7B).

## 274 **Dynamics in free and protein-bound amino acid pools**

275 Massive proteolysis during severe drought stress inevitably leads to liberation of large  
276 amounts of amino acids. We thus changed perspective and focused on the further fate  
277 of the degraded part of the proteome and its effect on free amino acid homeostasis. For  
278 each individual protein we calculated the difference in absolute content in control vs.  
279 stressed plants (Fig. 8A top, Supp. Dataset S1). It immediately becomes obvious that  
280 the amino acids added to the free pool are quantitatively derived from a limited number  
281 of very high abundant proteins. Degradation of about 200 million RubisCO  
282 hexadecamers per cell alone accounts for 28 % of the total amino acid release during  
283 stress. The profiles of free amino acids in the leaves of control and stressed plants were  
284 quantified by HPLC (Supp. Dataset S3). In addition, we calculated the total amount of  
285 each individual amino acid bound in proteins on the basis of the leaf protein content and  
286 the quantitative composition of the proteome. The pool sizes and compositions of the  
287 free and protein bound amino acid pools can be visualized using a modified version of  
288 PROTEOmaps (Fig. 8B, orange: free pool, blue: protein-bound pool). Under control  
289 conditions, the Arabidopsis leaves contained  $1.05 \text{ mmol} \cdot \text{g}^{-1} \text{ DW}$  amino acids of which  
290  $0.93 \text{ mmol} \cdot \text{g}^{-1} \text{ DW}$  were bound in proteins. Drought stress led to a decrease of the total  
291 amino content by 28 %. Also, the ratio between free and protein bound amino acids  
292 shifted from 0.13 to 0.39 due to massive proteolysis. The amino acid composition of the  
293 proteome did not change considerable during stress. The molar share of the 20  
294 proteinogenic amino acid was in the range of 1.3 % (Cys) to 9.0 % (Ala). In contrast, the  
295 free amino acid pool strongly reacted to drought stress and also the concentrations of  
296 high and low abundant amino acids differed up to 460-fold (Fig. 8B, Supp. Dataset S4).  
297 Under control conditions, the free amino acid pool was dominated by Glu, Gln and Asp.  
298 Water deficiency led to progressive accumulation of Pro, which in the leaves of severely  
299 stressed plants represented 59 % of the free and 17 % of the total amino acid pool. In  
300 order to estimate the role of proteolysis in amino acid homeostasis we calculated the  
301 theoretical composition of the free amino acid pool that would result from partial  
302 degradation of the proteome (as detected by our proteomics approach) without any  
303 metabolic conversion of the amino acids produced (Fig. 8A, grey bars). With the clear  
304 exception of Pro the free amino acid contents actually detected in severely stressed



305 leaves (Fig. 8A, red bars) were several fold lower than the calculated ones indicating  
306 their degradation or conversion to other metabolites. Enzymes involved in the  
307 degradation of branched-chain amino acids, Cys, Lys, and Arg were indeed increased  
308 by drought stress, as were Pro and GABA metabolism (Supp. Dataset S1, Supp. Fig.  
309 S3).

310

## 311 **Discussion**

### 312 **Estimating protein copy numbers in a plant cell**

313 Common sense indicates that cells require an adequate set of proteins to function  
314 properly. However, we were not able to deduce a comprehensive picture of what this  
315 protein infrastructure of a plant cell might look like from the literature. Thus we calculated  
316 the average protein copy number in a plant cell based on published information about  
317 the size and number of cells in an average Arabidopsis leaf (copy numbers are  
318 summarized in Table 2). We selected mesophyll cells as the representative leaf cell,  
319 since they are photosynthetically active and constitute the major part of the leaf volume.  
320 Total protein copy numbers have already been reported for yeast cells and different  
321 animal cell lines. A haploid cell of *Saccharomyces cerevisiae* has a volume of  $42 \mu\text{m}^3$   
322 (Jorgensen et al. 2002) and contains about 42 million proteins (Ho et al. 2017) whereas  
323 for human cells with a volume of about  $4200 \mu\text{m}^3$  3 billion protein molecules have been  
324 calculated (Kulak et al. 2014). Thus, yeast and human cells contain 1.0 and 0.7 million  
325 proteins per  $\mu\text{m}^3$ , respectively. An average mature leaf cell has a volume of  
326 approximately  $150.000 \mu\text{m}^3$  (Supp. Fig. S1). Assuming an average protein abundance of  
327  $0.85 \cdot 10^6$  molecules per  $\mu\text{m}^3$  and subtracting the volume of the central vacuole that  
328 typically covers about 80 % of a plant cell we postulate that a leaf mesophyll cell  
329 contains about 25 billion proteins (Table 2; Supp. Fig. S1). An alternative, completely  
330 independent way to calculate protein copy numbers is based on an average number of  
331 300.000 mesophyll cells (Wuyts et al. 2010) in a mature rosette leaf of 5 mg DW with a  
332 protein content of  $102 \text{ mg} \cdot \text{g}^{-1}$  DW. 1.7 ng protein per cell would add up to 20.5 billion  
333 protein molecules with an average molecular weight of 50 kDa. Quantitative proteomics  
334 irrespective of its intrinsic limitations, which will be discussed in the next paragraph,  
335 makes it possible to deduce a more precise estimate of 25 billion proteins per cell and in

336 addition it provides information about the copy numbers of individual proteins (Table 2;  
337 Supp. Dataset S1).

338 A major function of leaf mesophyll cells is photosynthesis and this is reflected by the  
339 large fraction of proteins (20 billion) localized in the about 100 chloroplast present in  
340 each cell corresponding to about 200 million proteins per chloroplast, and again the  
341 largest fraction of these are included in 4 million RubisCO hexadecamers (Königer et al.  
342 2008). Interestingly, the protein copy number we calculated for the cytosol of a plant cell  
343 (3.1 million) matches almost exactly the total number of proteins reported for animal  
344 cells (Kulak et al. 2014). According to our estimation a mesophyll cell contains about 488  
345 million mitochondrial proteins (Table 2). Assuming that between 300 and 450  
346 mitochondria are present in a plant cell depending on the leaf age (Preuten et al. 2010),  
347 a single mitochondrion would harbor 1.1 to 1.6 million protein molecules, which is in  
348 perfect agreement with previous results (Fuchs et al. 2020).

### 349 **Strengths and limitations of the proteomics approach and its different evaluation** 350 **strategies**

351 For statistical analysis to identify significant differences between the stress levels we  
352 used LFQ, an algorithm optimized for accurate comparisons between different samples  
353 including multiple levels of normalization (Cox et al. 2014). This approach e.g. helps to  
354 identify a set of extracellular proteases that might be particularly relevant during drought  
355 stress response or to estimate the regulation of amino acid catabolic pathways (Supp.  
356 Fig. S3). However, LFQ based data interpretation is not suitable for comparing the  
357 abundance of different protein species. In contrast, a quantitative perspective on the leaf  
358 proteome based on iBAQs makes it possible to calculate mass fractions, molarities, and  
359 even copy numbers of individual proteins but it lacks statistics. Both evaluations are  
360 limited by the intrinsic shortcomings of shotgun proteomics, which cannot detect very  
361 low abundant proteins and tends to underestimate membrane proteins since the  
362 biochemical properties of their peptides such as high hydrophobicity are unfavorable for  
363 ionization and detection (Schwanhäusser et al. 2011; Fabre et al. 2014; Krey et al.  
364 2014). Every proteomics dataset therefore has to be regarded as a representative  
365 fraction of the complete picture.



366 **Proteostasis under challenging conditions - individual strategies for subcellular**  
367 **compartments and metabolic pathways**

368 ***How to focus on the relevant pathways during severe drought stress***

369 Combined information about protein abundance and expression level illustrates the  
370 general strategies employed by the leaf cells to adjust their protein setup to the  
371 challenges posed by insufficient water supply. Specific stress related proteins and those  
372 involved in secondary metabolism are induced at the expression level. Similarly, cells  
373 increase the abundance of pathways that are barely used under control conditions but  
374 important to make alternative energy sources accessible such as protein, amino acid,  
375 and lipid catabolism by *de novo* synthesis. In contrast, the basic mitochondrial functions  
376 fulfilled by TCA cycle and respiratory chain are not required to be more active during  
377 stress than under control conditions, they just change their initial substrate from  
378 carbohydrates to amino acids and lipids. Therefore, it makes perfect sense that these  
379 pathways are preserved from degradation rather than up-regulated at the transcriptional  
380 level. Protection from degradation might be achieved by selective autophagy of specific  
381 organelles. During developmental senescence autophagic vesicles have been shown to  
382 preferentially contain RubisCO, entire chloroplasts, and also ribosomes whereas  
383 mitochondrial integrity and function is preserved until very late stages (Chrobok et al.  
384 2016; Marshall and Vierstra 2018). Our results are in good agreement with this finding  
385 since we observed stronger than average decrease rates in plastid and ribosomal  
386 proteins during progressive drought stress but very little effect on mitochondrial proteins.  
387 Ribosomes are among the most stable proteins under control conditions (Li et al. 2017).  
388 However, they tie up a significant fraction of the cellular resources since they account for  
389 a majority of the cell's RNA and also about 3 % of the protein mass. Thus, the turnover  
390 of ribosomes in eukaryotes is activated by nutritional stress such as carbon, nitrogen, or  
391 phosphate deficiency (Floyd et al. 2016). Conveniently, this measure also serves the  
392 purpose to down-regulate protein synthesis rates during stress. Apart from selective  
393 autophagy the stability of individual proteins can be regulated via ubiquitylation and is  
394 also affected by other post-translational modifications, substrate or cofactor binding  
395 leading to faster degradation of the less busy enzymes (Nelson and Millar 2015).

396 ***Proteolytic systems and their contribution to stress induced protein turnover***

397 Autophagy and proteasomes are considered to be the two major proteolytic systems in a  
398 cell. However, due to the sheer abundance of chloroplasts, the plastid proteases  
399 according to our evaluation represent the major share of proteolytic enzymes in a leaf  
400 cell under control conditions. Thus, they would be suitable for contributing considerably  
401 to the regular turnover of chloroplast proteins. Since amino acid synthesis is also  
402 localized mainly in these organelles they are perfectly equipped for exporting also the  
403 amino acids resulting from proteolysis (Pottosin and Shabala 2016). However, the  
404 frequency of proteases per total number of proteins is comparatively low in chloroplasts  
405 and in contrast to other subcellular compartments does not increase during stress. Bulk  
406 degradation of chloroplast proteins during severe dehydration therefore requires  
407 additional capacities outside the chloroplast and these can be provided by the lytic  
408 vacuoles that strongly increase their protease content and are able to hydrolyze proteins  
409 delivered by autophagic vesicles (Michaeli and Galili 2014; Marshall and Vierstra 2018).

410 In contrast to plastids the extracellular space is extremely rich in protease molecules per  
411 total proteins. Apart from maintaining the cell wall, major functions of the apoplast are  
412 signaling and defense against pathogens, which both involve proteolysis. Extracellular  
413 plant proteases hydrolyze proteins of invading pathogens to inactivate them and also to  
414 release signal peptides triggering immune reactions (Balakireva and Zamyatnin 2018).  
415 Plant peptide hormones are usually produced as pre-pro-protein and need to be  
416 activated by proteolytic cleavage (Stührwohldt and Schaller 2019). This function has  
417 been shown to be particularly relevant for drought resistance. Extracellular subtilisin-like  
418 proteases are involved in the regulation of stomatal density and distribution in response  
419 to environmental stimuli (Berger and Altmann 2000; Engineer et al. 2014). In addition,  
420 the subtilase SASP degrades and thus inactivates OST1, a kinase activated by abscisic  
421 acid (ABA), and therefore acts as a negative regulator in ABA signaling (Wang et al.  
422 2018). Our dataset shows a strong induction of SASP during drought stress and  
423 identifies 14 additional extracellular proteases that are significantly increased and thus  
424 might be relevant for stress resistance. The apoplast proteome is remarkably stable  
425 even during severe dehydration. This finding might indicate a specific relevance of  
426 extracellular proteins during drought stress, which is clearly the case for proteases. An

427 alternative explanation could be that apoplast proteins simply evade the intracellular bulk  
428 degradation systems autophagy and proteasome due to their remote localization.

429 **Amino acid homeostasis under challenging conditions – massive adjustments to**  
430 **the free pool provide osmolytes and ATP**

431 The free pool represents only about 11 % of all cellular amino acids under control  
432 conditions but strongly gains impact in the course of the drought stress response. Also,  
433 despite massive proteolysis the relative composition of the proteome looks roughly  
434 similar before and after stress (Supp. Fig. S4), whereas changes on the metabolite level  
435 are rapid and drastic (Fig. 8B). Taken together these observations illustrate that  
436 homeostasis has a different meaning with regard to free amino acids and proteins.  
437 Proline is a well-known compatible osmolyte in plants and also in some euryhaline  
438 animals (Szabados and Saviouré 2010; Wiesenthal et al. 2019). Free proline  
439 accumulated 219 fold and even its total amount (free plus bound in proteins) increased  
440 from 48 to 153  $\mu\text{mol} \cdot \text{g}^{-1}$  DW during progressive drought stress indicating extensive *de*  
441 *novo* synthesis (Supp. Dataset S4, Supp. Fig. S5). In contrast, the total contents of all 19  
442 proteinogenic amino acids except Pro clearly decreased during the stress phase  
443 indicating that they are most likely not synthesized during stress, but accumulate in the  
444 free pool as a consequence of proteolysis (Supp. Fig. S5). An exception might be those  
445 amino acids that serve as precursors for secondary metabolites such as the aromatic  
446 amino acids (Tzin and Galili 2010). The sum of all amino acids dropped by 29 % during  
447 stress most likely due to their use as alternative respiratory substrates and precursors  
448 for secondary metabolites (Araujo et al. 2011; Hildebrandt 2018). In order to develop an  
449 idea about how long plants would be able to keep up their regular mitochondrial  
450 respiration rate when using exclusively the amino acids released by protein degradation  
451 as substrates we calculated the total number of electrons that would be transferred to  
452 oxygen via the mitochondrial respiratory chain during complete oxidation of the specific  
453 set of amino acids released during drought stress (Supp. Dataset S4, Hildebrandt et al.  
454 2015). This oxidation process would lead to a total oxygen consumption of 1062  $\mu\text{mol O}_2$   
455  $\cdot \text{g}^{-1}$  DW and thus, on the basis of a mean leaf respiration rate of 3.4  $\text{nmol O}_2 \cdot \text{g}^{-1}$  fresh  
456 weight  $\cdot \text{s}^{-1}$  (O’Leary et al. 2017) could fully sustain leaf energy metabolism for about  
457 seven hours. However, leaf respiration rates tend to decrease during dehydration

458 (Pineiro and Shaves 2011), so that amino acid catabolism in addition to some residual  
459 photosynthetic activity and the oxidation of lipids and chlorophyll can be anticipated to  
460 make a significant contribution to the ATP supply of drought stressed plants.

461

462

## 463 **Materials and Methods**

### 464 **Plant growth and drought stress treatment**

465 *Arabidopsis thaliana* Columbia-0 plants were grown for two weeks in pots (200 cm<sup>3</sup>) in a  
466 phytochamber (22 - 24 °C, 16 h light, 8 h darkness, 110 μmol s<sup>-1</sup> m<sup>-2</sup> light). The stress  
467 treatment started with soaking the substrate (Steckmedium, Klasmann-Deilmann GmbH)  
468 with tap water to a distinct weight (150 g). A uniform desiccation process was achieved  
469 by monitoring pot weights and reorganizing the positions of the pots in the chamber  
470 every other day. After 10 days without watering leaf material (complete rosettes) was  
471 harvested on a daily basis (Fig. 2). During late stages of severe drought stress (S4-S7)  
472 plants were additionally sub-classified according to their leaf phenotype (S4: 4-7 rolled  
473 leaves S5: 8-10 rolled leaves, S6: > 10 rolled leaves). For each stress level, seven  
474 stressed plants and three controls were harvested. In addition, three stressed plants  
475 were re-watered to test their viability and harvested after 24h.

### 476 **Determination of relative water content (RWC)**

477 The method used is based on Smart and Bingham 1974. The weight of a leaf was  
478 measured immediately after harvest (fresh weight, FW), after overnight incubation in  
479 distilled water (turgor weight, TW), and after overnight drying at 37 °C (dry weight, DW).

480 RWC was calculated according to the following formular:  $RWC[\%] = \frac{(FW-DW)}{(TW-DW)} \times 100$

### 481 **Extraction and quantification of total protein**

482 5 mg lyophilized plant rosette powder was dissolved in 700 μl methanol (100 %) and  
483 incubated for 20 min shaking at 80 °C. After centrifugation (10 min, 4 °C, 18.800 xg) the  
484 pellet was washed twice in 1 ml ethanol (70 %) and resuspended in 400 μl NaOH (0.1  
485 M). The solution was incubated for 1h shaking at 95 °C and centrifuged again. The  
486 protein content of the supernatant was quantified using Ready-to-use Coomassie Blue  
487 G-250 Protein Assay Reagent (ThermoFisher) and Albumin Standard 23209  
488 (ThermoFisher).

### 489 **Quantification of free amino acids by HPLC**

490 Free amino acids were extracted as described in Batista et al. (2019). The pre-column  
491 derivatization with o-phthaldialdehyde (OPA) and fluorenylmethoxycarbonyl (FMOC)  
492 was based on the application note “Automated amino acids analysis using an Agilent  
493 Poroshell HPH-C18 Column” by Agilent. The samples were injected onto a 100 mm x 3  
494 mm InfinityLab Poroshell HPH-C18 column (2.7  $\mu$ m) using an Ultimate 3000 HPLC  
495 system (ThermoFisher). HPLC settings were set as described in Batista et al. 2019.  
496 Cysteine was quantified after derivatization with the fluorescent dye monobromobimane  
497 using the same HPLC system (Fahey et al 1980; Newton et al. 1981). 5 mg lyophilized  
498 plant powder was mixed with 10  $\mu$ l bromobimane (46 mM in acetonitrile), 100  $\mu$ l  
499 acetonitrile, and 200  $\mu$ l buffer (160 mM HEPES, 16 mM EDTA, pH 8.0) and incubated on  
500 a shaker for 30 min in darkness before adding 100  $\mu$ L methanesulfonic acid (65 mM).  
501 Samples were separated on a LiChrospher 60 RP-select Hibar RT 5  $\mu$ m column (Merck)  
502 at 18 °C using a gradient of two solvents (0.25 % acetic acid (pH 4) and methanol).  
503 Labeled thiols were detected using a fluorescence detector 3400 RS (ThermoFisher) at  
504 380 nm for excitation and 480 nm for emission.

#### 505 **Protein extraction and label-free quantitative shotgun mass spectrometry**

506 For protein extraction, about 5 mg of the lyophilized rosette powder was used (C, S3,  
507 S5, S6; n=4). Protein extraction, sample preparation, and LC-MS/MS were performed as  
508 previously described (Thal et al. 2018) using a Q-Exactive mass spectrometer coupled  
509 to an Ultimate 3000 UPLC (ThermoFisher).

#### 510 **Protein identification by MaxQuant and data processing via Perseus software**

511 The LC-MS/MS spectra were analyzed using MaxQuant (Version 1.5.5.1, Cox and Mann  
512 2008) and protein identification was based on the TAIR10 database. The search  
513 parameters were set to: carbamidomethylation (C) as fixed modification, oxidation (M)  
514 and acetylation (protein N-term) as variable modifications. The specific digestion mode  
515 was set to trypsin (P) and a maximum of two missed cleavage sites was allowed. FDR at  
516 the protein and PSM level was set to 1 %. For maximum proteome coverage, the  
517 minimum number of unique peptides per protein group was 1. Unique and razor  
518 peptides were used for protein quantification. The iBAQ function of MaxQuant was  
519 enabled, “log fit” disabled. Further analysis and statistical evaluation based on LFQ and

520 iBAQ values generated by MaxQuant were performed in Perseus (version 1.6.1.1),  
521 (Tyanova et al. 2016). The LFQ dataset was filtered to remove potential contaminations,  
522 reverse sequences or those only identified by site. Proteins were also excluded from  
523 further analysis if they were not detected in at least three of four replicates in at least  
524 one group (C, S3, S5, S6). Missing protein intensities were then considered as too low  
525 for proper quantification and replaced by very low values from a normal distribution.  
526 Finally, a list of 1399 proteins (Supp. Dataset S1) was used for all further calculations.  
527 Statistical analysis of the MS dataset was performed in Perseus using two-sample t-  
528 tests ( $P < 0.05$ ).

### 529 **Calculating absolute contents of individual proteins based on iBAQ values**

530 Raw iBAQ values generated by MaxQuant were multiplied with the molecular weight of  
531 the respective protein [kDa]. These individual weighted iBAQs were then divided by the  
532 sum of weighted iBAQs of all detected proteins for normalization and means of the four  
533 biological replicates in each sample group were calculated. The mean mass fractions  
534 were then multiplied with the total protein content of the sample [ $\text{mg} \cdot \text{g}^{-1}$  DW] to  
535 determine the mass content of each individual protein [ $\mu\text{g} \cdot \text{g}^{-1}$  DW]. The mass contents  
536 were divided by the molecular weight of the respective protein to calculate the molar  
537 protein contents [ $\text{nmol} \cdot \text{g}^{-1}$  DW]. Protein copy numbers in an individual mesophyll cell  
538 were calculated by multiplying the molar protein contents with the mean leaf dry weight  
539 and the Avogadro constant and dividing it by the mean number of mesophyll cells per  
540 leaf. A more detailed description of the calculation methods is provided in Supp. Figure  
541 S1.

### 542 **Calculating protein bound amino acid contents based on individual protein** 543 **contents**

544 The amino acid composition of each protein was determined on the basis of its  
545 sequence. The molar content of the protein was then multiplied with the number of each  
546 of the 20 amino acids present in this protein to calculate the molar contents of the  
547 individual amino acids. The resulting molar amino acid contents were summed up for all  
548 identified proteins in a sample. The total numbers of amino acids released due to



549 proteolysis were calculated by subtracting contents of protein bound amino acids in  
550 stressed and control plants.

551

552

### 553 **Calculating mitochondrial oxygen consumption with amino acids as alternative** 554 **respiratory substrates**

555 To estimate mitochondrial respiration in leaves that use exclusively the set of amino  
556 acids released by protein degradation during drought stress as substrates total leaf  
557 amino acid contents of stressed plants were subtracted from those of control plants. For  
558 each amino acid this difference was multiplied with the number of electrons transferred  
559 to the respiratory chain during complete oxidation (Hildebrandt et al. 2015) and divided  
560 by four to calculate the total amount of oxygen consumed (Supp. Dataset S4).

### 561 **Genevestigator datasets**

562 The following three microarray datasets were used for estimating gene expression levels  
563 during drought stress: 1. AT-00684\_1 (Ludwikow et al. 2009; long-day conditions, start:  
564 3 weeks, samples after 5 days of dehydration in soil); 2. AT-00626\_1 (Pandey et al.  
565 2013: long-day conditions, start: 3 weeks, samples after 10 days of dehydration in soil);  
566 3. AT-00292\_1 (Perera et al. 2008: short-day conditions, start: 6 weeks, samples after 7  
567 days of dehydration in soil)

### 568 **Supplemental Data Files**

569 Supplemental Figure S1: Calculation of individual protein contents and copy numbers

570 Supplemental Figure S2: Principal component analysis of the MS dataset

571 Supplemental Figure S3: Drought stress-induced amino acid degradation delivers  
572 nitrogen and glutamate for the production of proline and GABA as osmolytes

573 Supplemental Figure S4: Changes in the quantitative composition of the leaf proteome  
574 during drought stress (Proteomaps)



575 Supplemental Figure S5: Sum of free and protein bound contents for all 20  
576 proteinogenic amino acids during progressive drought stress in *Arabidopsis thaliana*  
577 rosette leaves

578 Supplemental Dataset S1: Complete MS dataset: LFQ and iBAQ values, relative protein  
579 abundances, mass contents [ $\mu\text{g} \cdot \text{g}^{-1}$  DW], molar contents [ $\text{nmol} \cdot \text{g}^{-1}$  DW], and copy  
580 numbers [million proteins per cell] of 1399 protein species during progressive drought  
581 stress

582 Supplemental Dataset S2: Combined analysis of protein abundances and expression  
583 levels to identify general strategies of leaf cells to adjust their protein setup to the  
584 challenges posed by insufficient water supply.

585 Supplemental Dataset S3: Free amino acid contents in *Arabidopsis thaliana* rosette  
586 leaves during progressive drought stress.

587 Supplemental Dataset S4: Pools of bound and free proteinogenic amino acids in  
588 *Arabidopsis thaliana* rosette leaves during progressive drought stress.

589

## 590 **Acknowledgements**

591 We thank Marianne Langer and Dagmar Lewejohann for skillful technical assistance  
592 during MS sample preparation and Michael Senkler for IT support.

593

## 594 **Author Contributions**

595 TMH and HPB initiated the project; TMH designed the research; BH performed most  
596 experiments; BH and PK performed the shotgun proteomics experiments; TMH and BH  
597 analyzed the data; TMH wrote the paper with support from HPB and BH.

## 598 References

- 599  
600 Alcázar, R., Marco, F., Cuevas, J.C., Patron, M., Ferrando, A., Carrasco, P., Tiburcio, A.F. and Altabella,  
601 T. (2006) Involvement of polyamines in plant response to abiotic stress. *Biotechnol Lett*, 28, 1867–  
602 1876 doi: 10.1007/s10529-006-9179-3.
- 603 Araújo, W.L., Tohge, T., Ishizaki, K., Leaver, C.J. and Fernie, A.R. (2011) Protein degradation - an  
604 alternative respiratory substrate for stressed plants. *Trends Plant Sci*, 16, 489–498 doi:  
605 10.1016/j.tplants.2011.05.008.
- 606 Baerenfaller, K., Grossmann, J., Grobei, M.A., Hull, R., Hirsch-Hoffmann, M., Yalovsky, S., Zimmermann,  
607 P., Grossniklaus, U., Gruissem, W. and Baginsky, S. (2008) Genome-scale proteomics reveals  
608 Arabidopsis thaliana gene models and proteome dynamics. *Science (New York, N.Y.)*, 320, 938–941  
609 doi: 10.1126/science.1157956.
- 610 Balakireva, A.V. and Zamyatnin, A.A. (2018) Indispensable Role of Proteases in Plant Innate Immunity.  
611 *International journal of molecular sciences*, 19 doi: 10.3390/ijms19020629.
- 612 Bar-On, Y.M. and Milo, R. (2019) The global mass and average rate of rubisco. *Proceedings of the*  
613 *National Academy of Sciences of the United States of America*, 116, 4738–4743 doi:  
614 10.1073/pnas.1816654116.
- 615 Batista-Silva, W., Heinemann, B., Rugen, N., Nunes-Nesi, A., Araújo, W.L., Braun, H.-P. and Hildebrandt,  
616 T.M. (2019) The role of amino acid metabolism during abiotic stress release. *Plant, cell & environment*,  
617 42, 1630–1644 doi: 10.1111/pce.13518.
- 618 Berger, D. and Altmann, T. (2000) A subtilisin-like serine protease involved in the regulation of stomatal  
619 density and distribution in Arabidopsis thaliana. *Genes Dev.*, 14, 1119–1131 doi:  
620 10.1101/gad.14.9.1119.
- 621 Bradford, M.M. (1976) A rapid and sensitive method for the quantitation of microgram quantities of protein  
622 utilizing the principle of protein-dye binding. *Analytical Biochemistry*, 72, 248–254 doi: 10.1016/0003-  
623 2697(76)90527-3.
- 624 Chrobok, D., Law, S.R., Brouwer, B., Lindén, P., Ziolkowska, A., Liebsch, D., Narsai, R., Szal, B., Moritz,  
625 T., Rouhier, N., Whelan, J., Gardeström, P. and Keech, O. (2016) Dissecting the Metabolic Role of  
626 Mitochondria during Developmental Leaf Senescence. *Plant physiology*, 172, 2132–2153 doi:  
627 10.1104/pp.16.01463.
- 628 Cox, J., Hein, M.Y., Luber, C.A., Paron, I., Nagaraj, N. and Mann, M. (2014) Accurate proteome-wide  
629 label-free quantification by delayed normalization and maximal peptide ratio extraction, termed  
630 MaxLFQ. *Molecular & cellular proteomics : MCP*, 13, 2513–2526 doi: 10.1074/mcp.M113.031591.
- 631 Cox, J. and Mann, M. (2008) MaxQuant enables high peptide identification rates, individualized p.p.b.-  
632 range mass accuracies and proteome-wide protein quantification. *Nat Biotechnol*, 26, 1367–1372 doi:  
633 10.1038/nbt.1511.
- 634 Dikic, I. (2017) Proteasomal and Autophagic Degradation Systems. *Annual review of biochemistry*, 86,  
635 193–224 doi: 10.1146/annurev-biochem-061516-044908.
- 636 Engineer, C.B., Ghassemian, M., Anderson, J.C., Peck, S.C., Hu, H. and Schroeder, J.I. (2014) Carbonic  
637 anhydrases, EPF2 and a novel protease mediate CO<sub>2</sub> control of stomatal development. *Nature*, 513,  
638 246–250 doi: 10.1038/nature13452.
- 639 Fabre, B., Lambour, T., Bouyssié, D., Menneteau, T., Monsarrat, B., Bulet-Schiltz, O. and Bousquet-  
640 Dubouch, M.-P. (2014) Comparison of label-free quantification methods for the determination of protein  
641 complexes subunits stoichiometry. *EuPA Open Proteomics*, 4, 82–86 doi:  
642 10.1016/j.euprot.2014.06.001.
- 643 Fahey, R.C., Newton, G.L., Dorian, R. and Kosower, E.M. (1980) Analysis of biological thiols:  
644 Derivatization with monobromotrimethylammoniumbimane and characterization by electrophoresis and  
645 chromatography. *Analytical Biochemistry*, 107, 1–10 doi: 10.1016/0003-2697(80)90483-2.
- 646 Fernie, A.R., Roscher, A., Ratcliffe, R.G. and Kruger, N.J. (2001) Fructose 2,6-bisphosphate activates  
647 pyrophosphate: fructose-6-phosphate 1-phosphotransferase and increases triose phosphate to hexose  
648 phosphate cycling in heterotrophic cells. *Planta*, 212, 250–263 doi: 10.1007/s004250000386.
- 649 Floyd, B.E., Morriss, S.C., MacIntosh, G.C. and Bassham, D.C. (2016) Evidence for autophagy-dependent  
650 pathways of rRNA turnover in Arabidopsis. *Autophagy*, 11, 2199–2212 doi:  
651 10.1080/15548627.2015.1106664.
- 652 Fuchs, P., Rugen, N., Carrie, C., Elsässer, M., Finkemeier, I., Giese, J., Hildebrandt, T.M., Kühn, K.,  
653 Maurino, V.G., Ruberti, C., Schallenberg-Rüdinger, M., Steinbeck, J., Braun, H.-P., Eubel, H., Meyer,  
654 E.H., Müller-Schüssele, S.J. and Schwarzländer, M. (2020) Single organelle function and organization

- 655 as estimated from Arabidopsis mitochondrial proteomics. *The Plant journal : for cell and molecular*  
656 *biology*, 101, 420–441 doi: 10.1111/tpj.14534.
- 657 Hildebrandt, T.M. (2018) Synthesis versus degradation: directions of amino acid metabolism during  
658 Arabidopsis abiotic stress response. *Plant molecular biology*, 98, 121–135 doi: 10.1007/s11103-018-  
659 0767-0.
- 660 Hildebrandt, T.M., Nunes Nesi, A., Araújo, W.L. and Braun, H.-P. (2015) Amino Acid Catabolism in Plants.  
661 *Molecular plant*, 8, 1563–1579 doi: 10.1016/j.molp.2015.09.005.
- 662 Ho, B., Baryshnikova, A. and Brown, G.W. (2018) Unification of Protein Abundance Datasets Yields a  
663 Quantitative *Saccharomyces cerevisiae* Proteome. *Cell systems*, 6, 192-205.e3 doi:  
664 10.1016/j.cels.2017.12.004.
- 665 Hooper, C.M., Castleden, I.R., Tanz, S.K., Aryamanesh, N. and Millar, A.H. (2017) SUBA4: the interactive  
666 data analysis centre for Arabidopsis subcellular protein locations. *Nucleic acids research*, 45, D1064-  
667 D1074 doi: 10.1093/nar/gkw1041.
- 668 Hruz, T., Laule, O., Szabo, G., Wessendorp, F., Bleuler, S., Oertle, L., Widmayer, P., Grissem, W. and  
669 Zimmermann, P. (2008) Genevestigator v3: a reference expression database for the meta-analysis of  
670 transcriptomes. *Adv Bioinformatics*, 2008, 420747 doi: 10.1155/2008/420747.
- 671 Jorgensen, P., Nishikawa, J.L., Breikreutz, B.-J. and Tyers, M. (2002) Systematic identification of  
672 pathways that couple cell growth and division in yeast. *Science (New York, N.Y.)*, 297, 395–400 doi:  
673 10.1126/science.1070850.
- 674 Julia Mergner, Martin Frejno, Markus List, Michael Papacek, Xia Chen, Ajeet Chaudhary, Patroklos  
675 Samaras, Sandra Richter, Hiromasa Shikata, Maxim Messerer, Daniel Lang, Stefan Altmann, Philipp  
676 Cyprys, Daniel P. Zolg, Toby Mathieson, Marcus Bantscheff, Rashmi R. Hazarika, Tobias Schmidt,  
677 Corinna Dawid, Andreas Dunkel, Thomas Hofmann, Stefanie Sprunck, Pascal Falter-Braun, Frank  
678 Johannes, Klaus F. X. Mayer, Gerd Jürgens, Mathias Wilhelm, Jan Baumbach, Erwin Grill, Kay  
679 Schneitz, Claus Schwechheimer and Bernhard Kuster (2020) Mass-spectrometry-based draft of the  
680 Arabidopsis proteome. *Nature*, 1–6 doi: 10.1038/s41586-020-2094-2.
- 681 Klodmann, J., Sunderhaus, S., Nimtz, M., Jansch, L. and Braun, H.-P. (2010) Internal architecture of  
682 mitochondrial complex I from Arabidopsis thaliana. *The Plant cell*, 22, 797–810 doi:  
683 10.1105/tpc.109.073726.
- 684 Königer, M., Delamaide, J.A., Marlow, E.D. and Harris, G.C. (2008) Arabidopsis thaliana leaves with  
685 altered chloroplast numbers and chloroplast movement exhibit impaired adjustments to both low and  
686 high light. *J Exp Bot*, 59, 2285–2297 doi: 10.1093/jxb/ern099.
- 687 Krasensky, J. and Jonak, C. (2012) Drought, salt, and temperature stress-induced metabolic  
688 rearrangements and regulatory networks. *J Exp Bot*, 63, 1593–1608 doi: 10.1093/jxb/err460.
- 689 Krey, J.F., Wilmarth, P.A., Shin, J.-B., Klimek, J., Sherman, N.E., Jeffery, E.D., Choi, D., David, L.L. and  
690 Barr-Gillespie, P.G. (2013) Accurate Label-Free Protein Quantitation with High- and Low-Resolution  
691 Mass Spectrometers. *Journal of proteome research*, 13, 1034–1044 doi: 10.1021/pr401017h.
- 692 Kulak, N.A., Pichler, G., Paron, I., Nagaraj, N. and Mann, M. (2014) Minimal, encapsulated proteomic-  
693 sample processing applied to copy-number estimation in eukaryotic cells. *Nature methods*, 11, 319–  
694 324 doi: 10.1038/nmeth.2834.
- 695 Kwasniak, M., Pogorzelec, L., Migdal, I., Smakowska, E. and Janska, H. (2012) Proteolytic system of plant  
696 mitochondria. *Physiologia Plantarum*, 145, 187–195 doi: 10.1111/j.1399-3054.2011.01542.x.
- 697 Lam, H.-M., Wong, P., Chan, H.-K., Yam, K.-M., Chen, L., Chow, C.-M. and Coruzzi, G.M. (2003)  
698 Overexpression of the ASN1 gene enhances nitrogen status in seeds of Arabidopsis. *Plant physiology*,  
699 132, 926–935 doi: 10.1104/pp.103.020123.
- 700 Li, L., Nelson, C.J., Trösch, J., Castleden, I., Huang, S. and Millar, A.H. (2017) Protein Degradation Rate  
701 in Arabidopsis thaliana Leaf Growth and Development. *Plant Cell*, 29, 207–228 doi:  
702 10.1105/tpc.16.00768.
- 703 Liebermeister, W., Noor, E., Flamholz, A., Davidi, D., Bernhardt, J. and Milo, R. (2014) Visual account of  
704 protein investment in cellular functions. *Proceedings of the National Academy of Sciences of the*  
705 *United States of America*, 111, 8488–8493 doi: 10.1073/pnas.1314810111.
- 706 Ludwików, A., Kierzek, D., Gallois, P., Zeef, L. and Sadowski, J. (2009) Gene expression profiling of  
707 ozone-treated Arabidopsis abi1td insertional mutant: protein phosphatase 2C ABI1 modulates  
708 biosynthesis ratio of ABA and ethylene. *Planta*, 230, 1003–1017 doi: 10.1007/s00425-009-1001-8.
- 709 Marshall, R.S. and Vierstra, R.D. (2018) Autophagy: The Master of Bulk and Selective Recycling. *Annual*  
710 *review of plant biology*, 69, 173–208 doi: 10.1146/annurev-arplant-042817-040606.

- 711 McClellan, A.J., Tam, S., Kaganovich, D. and Frydman, J. (2005) Protein quality control: chaperones  
712 culling corrupt conformations. *Nat Cell Biol*, 7, 736–741 doi: 10.1038/ncb0805-736.
- 713 Merchante, C., Stepanova, A.N. and Alonso, J.M. (2017) Translation regulation in plants: an interesting  
714 past, an exciting present and a promising future. *The Plant journal : for cell and molecular biology*, 90,  
715 628–653 doi: 10.1111/tpj.13520.
- 716 Michaeli, S. and Galili, G. (2014) Degradation of Organelles or Specific Organelle Components via  
717 Selective Autophagy in Plant Cells. *International journal of molecular sciences*, 15, 7624–7638 doi:  
718 10.3390/ijms15057624.
- 719 Nelson, C.J. and Millar, A.H. (2015) Protein turnover in plant biology. *Nature plants*, 1, 15017 doi:  
720 10.1038/nplants.2015.17.
- 721 Neuhoff, V., Stamm, R. and Eibl, H. (1985) Clear background and highly sensitive protein staining with  
722 Coomassie Blue dyes in polyacrylamide gels: A systematic analysis. *Electrophoresis*, 6, 427–448 doi:  
723 10.1002/elps.1150060905.
- 724 Newton, G.L., Dorian, R. and Fahey, R.C. (1981) Analysis of biological thiols: Derivatization with  
725 monobromobimane and separation by reverse-phase high-performance liquid chromatography.  
726 *Analytical Biochemistry*, 114, 383–387 doi: 10.1016/0003-2697(81)90498-X.
- 727 Nishimura, K., Kato, Y. and Sakamoto, W. (2016) Chloroplast Proteases: Updates on Proteolysis within  
728 and across Suborganellar Compartments. *Plant physiology*, 171, 2280–2293 doi:  
729 10.1104/pp.16.00330.
- 730 O'Leary, B.M., Lee, C.P., Atkin, O.K., Cheng, R., Brown, T.B. and Millar, A.H. (2017) Variation in Leaf  
731 Respiration Rates at Night Correlates with Carbohydrate and Amino Acid Supply. *Plant physiology*,  
732 174, 2261–2273 doi: 10.1104/pp.17.00610.
- 733 Pandey, N., Ranjan, A., Pant, P., Tripathi, R.K., Ateek, F., Pandey, H.P., Patre, U.V. and Sawant, S.V.  
734 (2013) CAMTA 1 regulates drought responses in Arabidopsis thaliana. *BMC genomics*, 14, 216 doi:  
735 10.1186/1471-2164-14-216.
- 736 Perera, I.Y., Hung, C.-Y., Moore, C.D., Stevenson-Paulik, J. and Boss, W.F. (2008) Transgenic  
737 Arabidopsis plants expressing the type 1 inositol 5-phosphatase exhibit increased drought tolerance  
738 and altered abscisic acid signaling. *Plant Cell*, 20, 2876–2893 doi: 10.1105/tpc.108.061374.
- 739 Pinheiro, C. and Chaves, M.M. (2011) Photosynthesis and drought: can we make metabolic connections  
740 from available data? *J Exp Bot*, 62, 869–882 doi: 10.1093/jxb/erq340.
- 741 Pottosin, I. and Shabala, S. (2016) Transport Across Chloroplast Membranes: Optimizing Photosynthesis  
742 for Adverse Environmental Conditions. *Molecular plant*, 9, 356–370 doi: 10.1016/j.molp.2015.10.006.
- 743 Preuten, T., Cincu, E., Fuchs, J., Zoschke, R., Liere, K. and Börner, T. (2010) Fewer genes than  
744 organelles: extremely low and variable gene copy numbers in mitochondria of somatic plant cells. *The*  
745 *Plant journal : for cell and molecular biology*, 64, 948–959 doi: 10.1111/j.1365-313X.2010.04389.x.
- 746 Schikowsky, C., Senkler, J. and Braun, H.-P. (2017) SDH6 and SDH7 Contribute to Anchoring Succinate  
747 Dehydrogenase to the Inner Mitochondrial Membrane in Arabidopsis thaliana. *Plant physiology*, 173,  
748 1094–1108 doi: 10.1104/pp.16.01675.
- 749 Schwanhäusser, B., Busse, D., Li, N., Dittmar, G., Schuchhardt, J., Wolf, J., Chen, W. and Selbach, M.  
750 (2011) Global quantification of mammalian gene expression control. *Nature*, 473, 337–342 doi:  
751 10.1038/nature10098.
- 752 Smart, R.E. (1974) Rapid estimates of relative water content. *Plant physiology*, 53, 258–260 doi:  
753 10.1104/pp.53.2.258.
- 754 Stührwoldt, N. and Schaller, A. (2019) Regulation of plant peptide hormones and growth factors by post-  
755 translational modification. *Plant biology (Stuttgart, Germany)*, 21 Suppl 1, 49–63 doi:  
756 10.1111/plb.12881.
- 757 Suraweera, A., Münch, C., Hanssum, A. and Bertolotti, A. (2012) Failure of amino acid homeostasis  
758 causes cell death following proteasome inhibition. *Molecular cell*, 48, 242–253 doi:  
759 10.1016/j.molcel.2012.08.003.
- 760 Szabados, L. and Saviouré, A. (2010) Proline: a multifunctional amino acid. *Trends Plant Sci*, 15, 89–97  
761 doi: 10.1016/j.tplants.2009.11.009.
- 762 Thimm, O., Bläsing, O., Gibon, Y., Nagel, A., Meyer, S., Krüger, P., Selbig, J., Müller, L.A., Rhee, S.Y. and  
763 Stitt, M. (2004) MAPMAN: a user-driven tool to display genomics data sets onto diagrams of metabolic  
764 pathways and other biological processes. *The Plant journal : for cell and molecular biology*, 37, 914–  
765 939 doi: 10.1111/j.1365-313x.2004.02016.x.

- 766 Tyanova, S., Temu, T., Sinitcyn, P., Carlson, A., Hein, M.Y., Geiger, T., Mann, M. and Cox, J. (2016) The  
767 Perseus computational platform for comprehensive analysis of (prote)omics data. *Nat Methods*, 13,  
768 731–740 doi: 10.1038/nmeth.3901.
- 769 Tzin, V. and Galili, G. (2010) New insights into the shikimate and aromatic amino acids biosynthesis  
770 pathways in plants. *Mol Plant*, 3, 956–972 doi: 10.1093/mp/ssq048.
- 771 van der Hoorn, R.A.L. (2008) Plant proteases: from phenotypes to molecular mechanisms. *Annual review*  
772 *of plant biology*, 59, 191–223 doi: 10.1146/annurev.arplant.59.032607.092835.
- 773 Vierstra, R.D. (2009) The ubiquitin-26S proteasome system at the nexus of plant biology. *Nature reviews.*  
774 *Molecular cell biology*, 10, 385–397 doi: 10.1038/nrm2688.
- 775 Wang, Q., Guo, Q., Guo, Y., Yang, J., Wang, M., Duan, X., Niu, J., Liu, S., Zhang, J., Lu, Y., Hou, Z.,  
776 Miao, W., Wang, X., Kong, W., Xu, X., Wu, Y., Rui, Q. and La, H. (2018) Arabidopsis subtilase SASP is  
777 involved in the regulation of ABA signaling and drought tolerance by interacting with OPEN STOMATA  
778 1. *Journal of Experimental Botany*, 69, 4403–4417 doi: 10.1093/jxb/ery205.
- 779 Wiesenthal, A.A., Müller, C., Harder, K. and Hildebrandt, J.-P. (2019) Alanine, proline and urea are major  
780 organic osmolytes in the snail *Theodoxus fluviatilis* under hyperosmotic stress. *The Journal of*  
781 *experimental biology*, 222 doi: 10.1242/jeb.193557.
- 782 Wuyts, N., Palauqui, J.-C., Conejero, G., Verdeil, J.-L., Granier, C. and Massonnet, C. (2010) High-  
783 contrast three-dimensional imaging of the Arabidopsis leaf enables the analysis of cell dimensions in  
784 the epidermis and mesophyll. *Plant Methods*, 6, 1–14 doi: 10.1186/1746-4811-6-17.
- 785

786



787 **Tables:**

788 **Table 1:** Estimating the enrichment of specific compartments (left) or metabolic pathways (right)  
 789 in groups of proteins regulated on a transcriptional (I, III) or post-translational (II, IV) level.  
 790 Numbers indicate the quotient of the fraction of proteins localized in specific compartments (left)  
 791 or attributed to metabolic pathways (right) in the regulation groups (I-IV) divided by the fraction of  
 792 the respective proteins in the total proteomics dataset. Group I: increased protein abundance,  
 793 increased expression, group II: increased protein abundance, unaffected or decreased  
 794 expression; group III: decreased protein abundance, decreased expression; group IV: decreased  
 795 protein abundance, unaffected or increased expression. Only metabolic pathways with quotients  
 796  $\geq 2$  in at least one regulation group are shown. The complete dataset used for enrichment  
 797 analysis is provided in Supp. Dataset S2.

| <b>Compartment</b> | <b>I</b>   | <b>II</b>  | <b>III</b> | <b>IV</b> | <b>Pathway</b>         | <b>I</b>   | <b>II</b>  | <b>III</b> | <b>IV</b> |
|--------------------|------------|------------|------------|-----------|------------------------|------------|------------|------------|-----------|
| Cytosol            | 1.0        | 0.8        | 0.5        | 1.1       | AA degradation         | <b>2.6</b> | 0.6        | 0.6        | 1.0       |
| ER                 | 1.5        | 1.9        | 0.8        | 0.7       | Cell wall              | 0.7        | <b>2.6</b> | 0.8        | 1.3       |
| Extracellular      | <b>2.3</b> | <b>3.1</b> | 0.2        | 0.4       | Glycolysis             | 1.0        | <b>2.2</b> | 0.0        | 0.0       |
| Golgi              | 0.0        | 0.8        | 0.6        | 1.6       | Lipid degradation      | <b>6.4</b> | 1.9        | 0.0        | 0.0       |
| Mitochondria       | 1.3        | 1.8        | 0.0        | 0.3       | Lipid synthesis        | 0.6        | 1.2        | <b>2.2</b> | 1.0       |
| Nucleus            | <b>2.3</b> | 0.8        | 0.5        | 0.7       | mETC                   | 0.0        | <b>2.2</b> | 0.0        | 0.3       |
| Peroxisome         | <b>3.2</b> | 0.8        | 0.0        | 1.1       | Protein degradation    | <b>2.0</b> | 1.5        | 0.0        | 0.8       |
| Plasma membrane    | <b>2.5</b> | 1.0        | 1.6        | 1.6       | Protein handling       | 0.5        | <b>2.3</b> | 0.0        | 1.2       |
| Chloroplast        | 0.3        | 0.6        | 1.7        | 1.1       | Secondary metabolism   | <b>2.3</b> | 1.1        | 1.3        | 0.6       |
| Vacuole            | 0.6        | 1.1        | <b>2.7</b> | 0.6       | Stress                 | <b>3.0</b> | 1.5        | 0.3        | 0.4       |
|                    |            |            |            |           | Tetrapyrrole synthesis | 0.0        | 0.0        | <b>9.0</b> | 1.2       |

798

799 **Table 2:** Total number of protein molecules in an average Arabidopsis leaf mesophyll cell and its  
 800 subcellular compartments under control conditions (C) and during progressive drought stress  
 801 (S3, moderate stress; S5, severe stress; S6, maximum tolerable stress). For each compartment,  
 802 the copy number of the most abundant protein is listed individually. All numbers are based on  
 803 estimations as discussed in the text (see also Supp. Fig. S1).

|                                                                       | Protein numbers (x10 <sup>6</sup> ) |              |              |              |
|-----------------------------------------------------------------------|-------------------------------------|--------------|--------------|--------------|
|                                                                       | C                                   | S3           | S5           | S6           |
| <b>No. of proteins in a mesophyll cell</b>                            | <b>25395</b>                        | <b>23976</b> | <b>15069</b> | <b>15116</b> |
| <b>No. of proteins in all chloroplasts of a mesophyll cell (~100)</b> | <b>19918</b>                        | <b>18724</b> | <b>11457</b> | <b>11302</b> |
| No. of RubisCO LS (AtCg00490) per cell                                | 3816                                | 4060         | 2424         | 2061         |
| No. of proteins in an individual chloroplast                          | 199                                 | 187          | 115          | 113          |
| No. of RubisCO LS (AtCg00490) per chloroplast                         | 2.0                                 | 1.9          | 1.2          | 1.1          |
| <b>No. of proteins in all mitochondria in a cell (~400)</b>           | <b>488</b>                          | <b>473</b>   | <b>380</b>   | <b>401</b>   |
| No. of serine hydroxymethyltransferase 1 (At4g37930) per cell         | 65                                  | 50           | 31           | 29           |
| No. of proteins in an individual mitochondrion                        | 1.2                                 | 1.2          | 0.9          | 1.0          |
| No. of serine hydroxymethyltransferase 1 (At4g37930) per mito.        | 0.16                                | 0.13         | 0.08         | 0.07         |
| <b>No. of proteins in the cytosol per cell</b>                        | <b>2741</b>                         | <b>2540</b>  | <b>1581</b>  | <b>1672</b>  |
| No. of GTP binding EF Tu (At5g60390) per cell                         | 139                                 | 129          | 74           | 83           |
| <b>No. of proteins in the vacuole</b>                                 | <b>518</b>                          | <b>437</b>   | <b>321</b>   | <b>306</b>   |
| No. of tonoplast intrinsic protein 2 (At3g26520) per cell             | 192                                 | 146          | 110          | 89           |
| <b>No. of proteins in the extracellular space per cell</b>            | <b>281</b>                          | <b>309</b>   | <b>283</b>   | <b>333</b>   |
| No. of germin-like protein 1 (At1g72610)                              | 106                                 | 60           | 46           | 45           |
| <b>No. of proteins per nucleus</b>                                    | <b>158</b>                          | <b>203</b>   | <b>92</b>    | <b>129</b>   |
| No. of ubiquitin 5 (At3g62250) per nucleus                            | 37                                  | 49           | 21           | 21           |
| <b>No. of proteins in all peroxisomes of a mesophyll cell</b>         | <b>605</b>                          | <b>641</b>   | <b>491</b>   | <b>525</b>   |
| No. of Aldolase-type TIM barrel protein (At3g14415) per cell          | 82                                  | 68           | 32           | 31           |
| <b>No. of proteins in the endoplasmic reticulum per cell</b>          | <b>73</b>                           | <b>69</b>    | <b>57</b>    | <b>57</b>    |
| No. of ADP-ribosylation factor 1 (At1g70490) per cell                 | 20                                  | 14           | 10           | 7.1          |
| <b>No. of proteins in all golgi apparatuses of a mesophyll cell</b>   | <b>34</b>                           | <b>35</b>    | <b>23</b>    | <b>24</b>    |
| No. of RGP2; UDP-arabinose mutase (At5g15650) per cell                | 5.0                                 | 5.4          | 5.5          | 6.1          |
| <b>No. of proteins in the plasma membrane per cell</b>                | <b>180</b>                          | <b>177</b>   | <b>128</b>   | <b>102</b>   |
| No. of Plasma membrane intrinsic protein 2A (At3g53420)               | 38                                  | 34           | 20           | 14           |

804

805

806

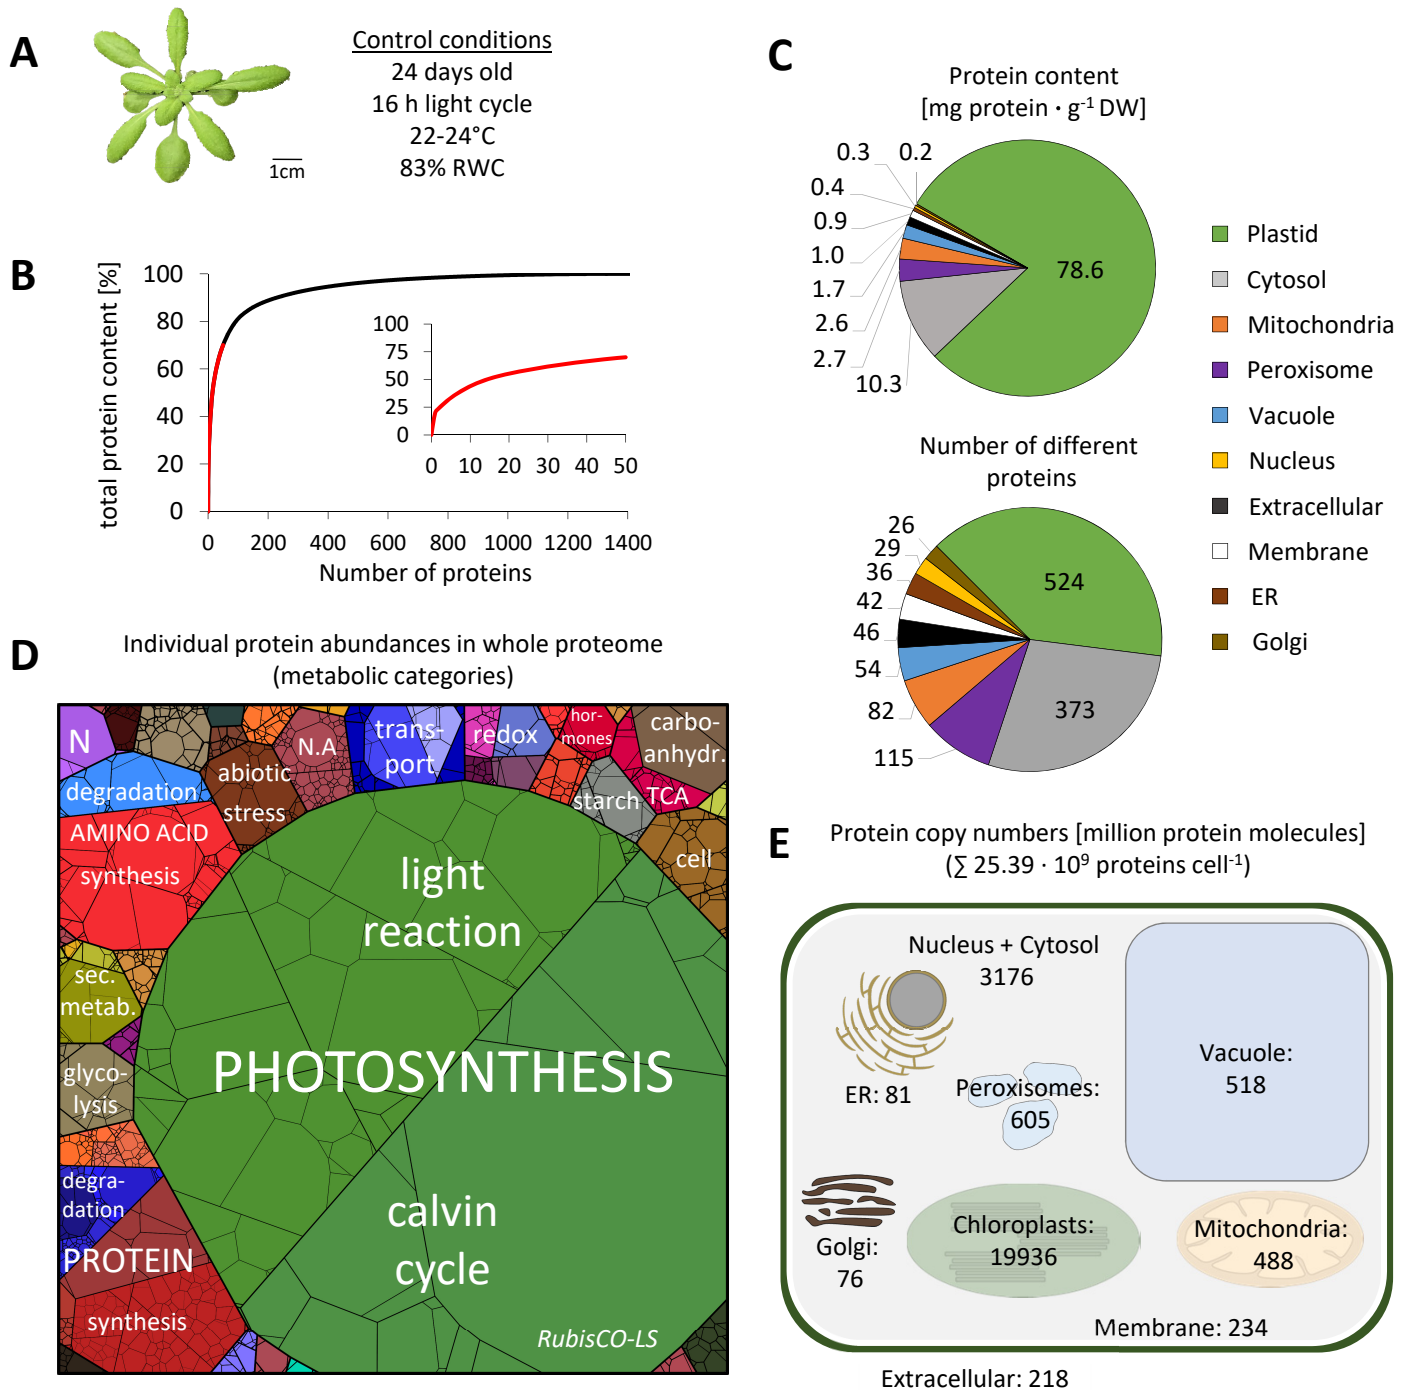

**Fig. 1: Quantitative composition of the Arabidopsis leaf proteome**

**A.** Phenotype of a representative control plant used for MS analysis **B.** Fraction of total protein content contributed by each of the 1399 proteins detected by shotgun proteomics. Proteins were sorted according to their absolute content in descending order and added up. The 50 most abundant proteins (red line) are shown in the inserted graph. **C.** Distribution of the proteins detected in control samples on the different subcellular compartments according to SUBA4 (Hooper et al. 2017). Protein content (sum of all individual protein contents calculated from iBAQs) vs. number of different protein species per subcellular compartment. **D.** Proteom map illustrating the quantitative composition of the leaf proteome under control conditions. Proteins are shown as polygons whose sizes represent the mass fractions (protein abundances obtained by mass spectrometry (iBAQ), multiplied with protein molecular weight). Proteins involved in similar cellular functions according to the MapMan annotation file (version Ath\_AGI\_LOCUS\_TAIR10\_Aug2012, Thimm et al. 2004) are arranged in adjacent locations and visualized by colors. **E.** Number of protein molecules [million proteins] present in the subcellular compartments of an average Arabidopsis mesophyll cell. Copy numbers represent the sum of protein molecules present in all chloroplasts (ca. 100; Königer et al. 2008), mitochondria (300-450; Preuten et al. 2010), or peroxisomes in the cell. Copy numbers for all individual proteins detected in our MS approach are given in Supp. Dataset S1.



**A**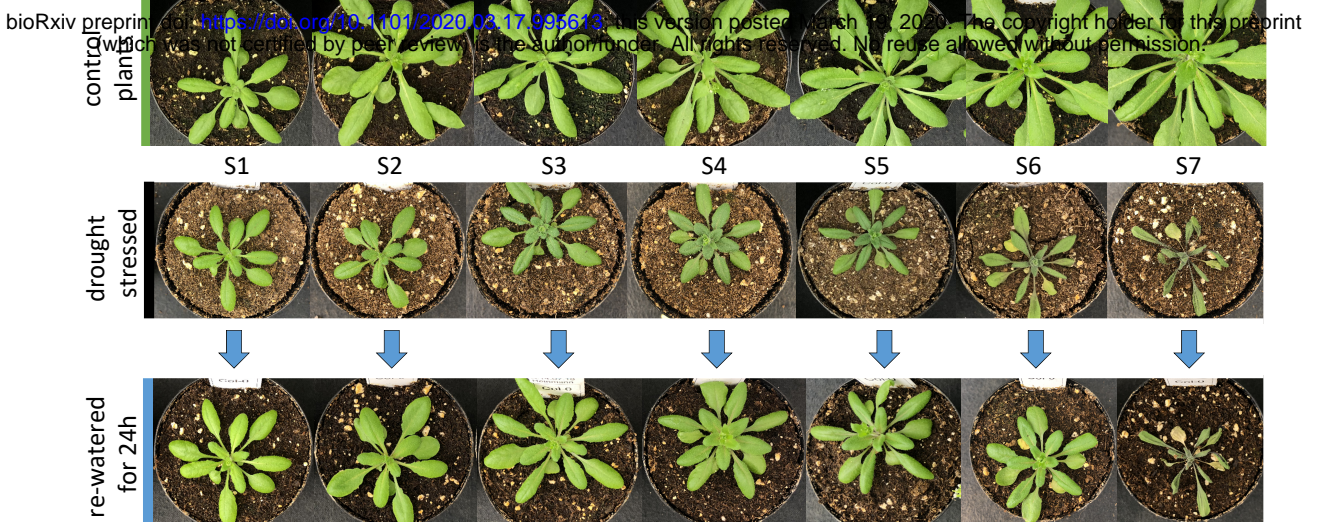**B**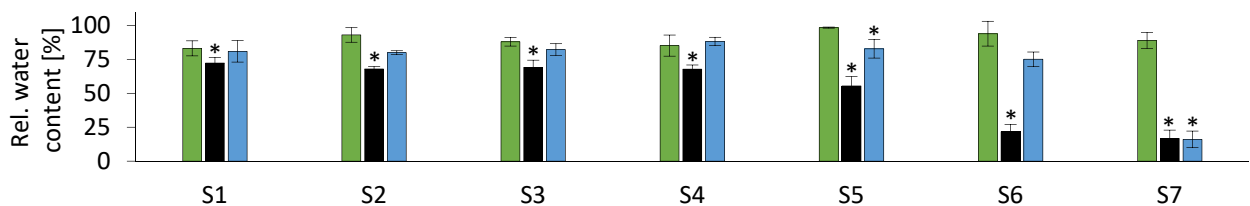**C**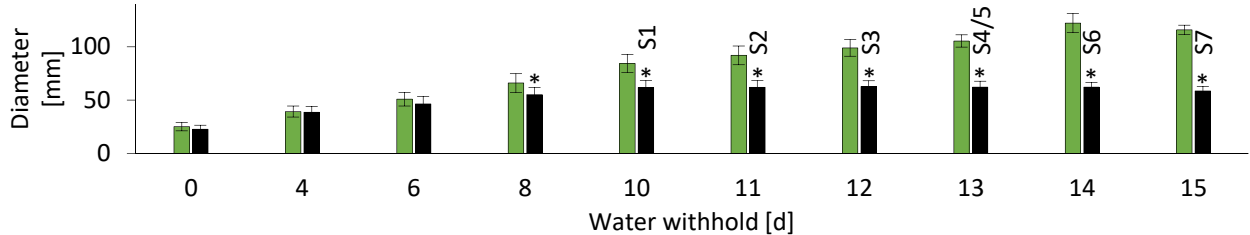

### Fig. 2: Complete setup of the progressive drought stress experiment

*Arabidopsis thaliana* plants were grown on soil under long-day conditions for 2 weeks before the start of the experiment. All pots were then brought to the same weight and the stress group was not watered for up to 15 days while the control group was kept at a constant water level. Leaf samples were taken starting after 10 days without water (stress level S1) until recovery of the plants was no longer possible (stress level S7) **A**. Phenotype of representative plants (pot diameter = 8 cm). **B**. Relative water content [%] in rosette leaves of control plants (green bars), stressed plants (black bars), and stressed plants 24h after re-watering (blue bars) at the different stress levels. **C**. Rosette diameter [mm] of control plants (green bars) and stressed plants (black bars) at 0 to 15 days after the beginning of the stress treatment. The corresponding stress levels of the plants are indicated on top of the black bars. A detailed description of the drought treatment is given in the methods section. S1-7, n=7; C1-7, n=3; R1-7, n=3. \* Students t-TEST p<0.01

Starting material (stress levels) for experimental analyses:

S1 10 days after end of watering

S2 11 days after end of watering

S3 12 days after end of watering, first signs of stress (rolled/wrinkled leaves)

S4 13 days after end of watering, 4-7 rolled leaves

S5 ~ 13 days after end of watering, 8-10 rolled leaves

S6 ~ 14 days after end of watering, >10 rolled leaves; recovery of plants still possible

S7 ~ 15 days after end of watering, > 10 rolled leaves; recovery of plants not possible

C1-C7: control plants (watering continued)

R1-R7: same as S1-S7, but re-watered for 24 h

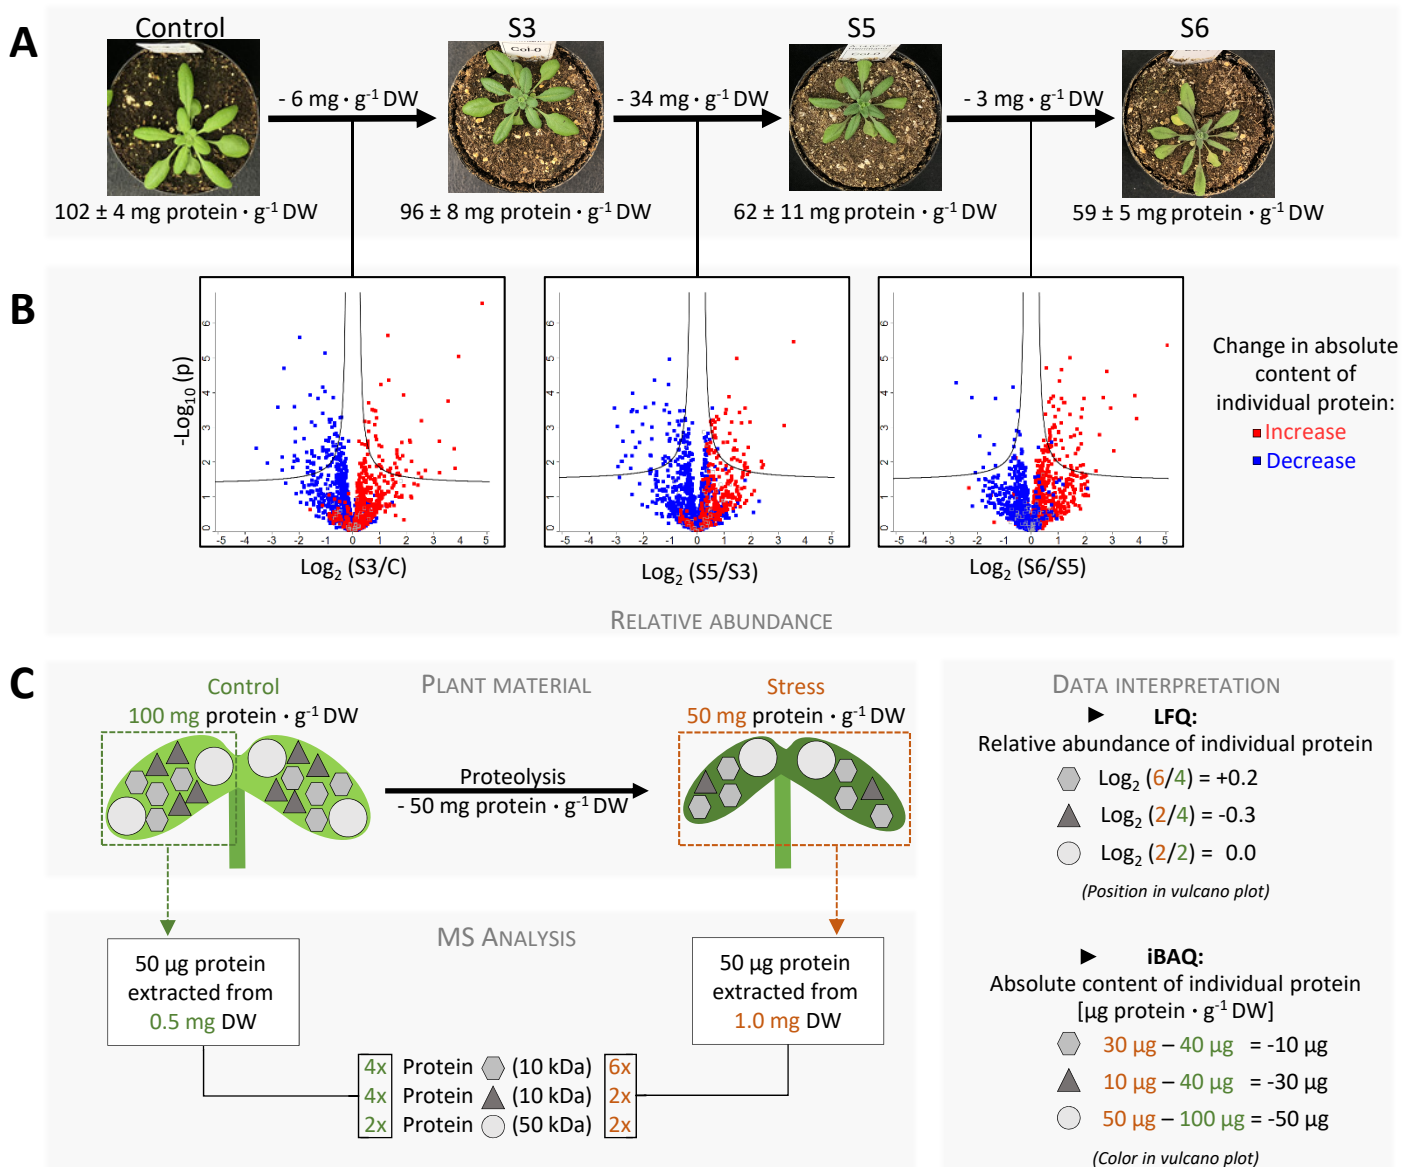

**Fig. 3: Different perspectives on the proteome of stressed plants: Relative vs. absolute changes in the leaf protein composition during progressive drought stress**

**A.** Phenotype and protein content of the plants used for proteome analysis. Complete rosettes of 4 plants were harvested at the beginning of the stress treatment (parallel to S1-S3) (control), and at three defined stress stages (S3, S5, S6), respectively. **B.** Volcano plot illustrating differences in protein abundance between the stress levels. The relative abundance of each individual protein is reflected by the position of the symbol in the plot. The curves given in solid lines represent the threshold for significance (FDR: 0.05, s0: 0.1). The symbol colors indicate changes in the absolute content of each protein (red: increase during stress, blue: decrease during stress). **C.** Schematic presentation of the two different approaches used for interpretation of the proteomics dataset. The relative abundance of each individual protein in the protein extracts used for MS analysis can be calculated on the basis of LFQ values. However, massive proteolysis during severe drought stress leads to large differences between the total protein content [ $\text{mg protein} \cdot \text{g}^{-1} \text{DW}$ ] of stressed vs. control plants. Therefore, in order to estimate changes in the absolute content of individual proteins during the stress treatment, we calculated the amount of each protein present in the leaf [ $\mu\text{g protein} \cdot \text{g}^{-1} \text{DW}$ ] by multiplying iBAQs with the molecular weight of the protein, calculating the mass fraction within the individual sample and multiplying it with the total protein content of the leaf. LFQ: label-free quantification, iBAQ: intensity-based absolute quantification.

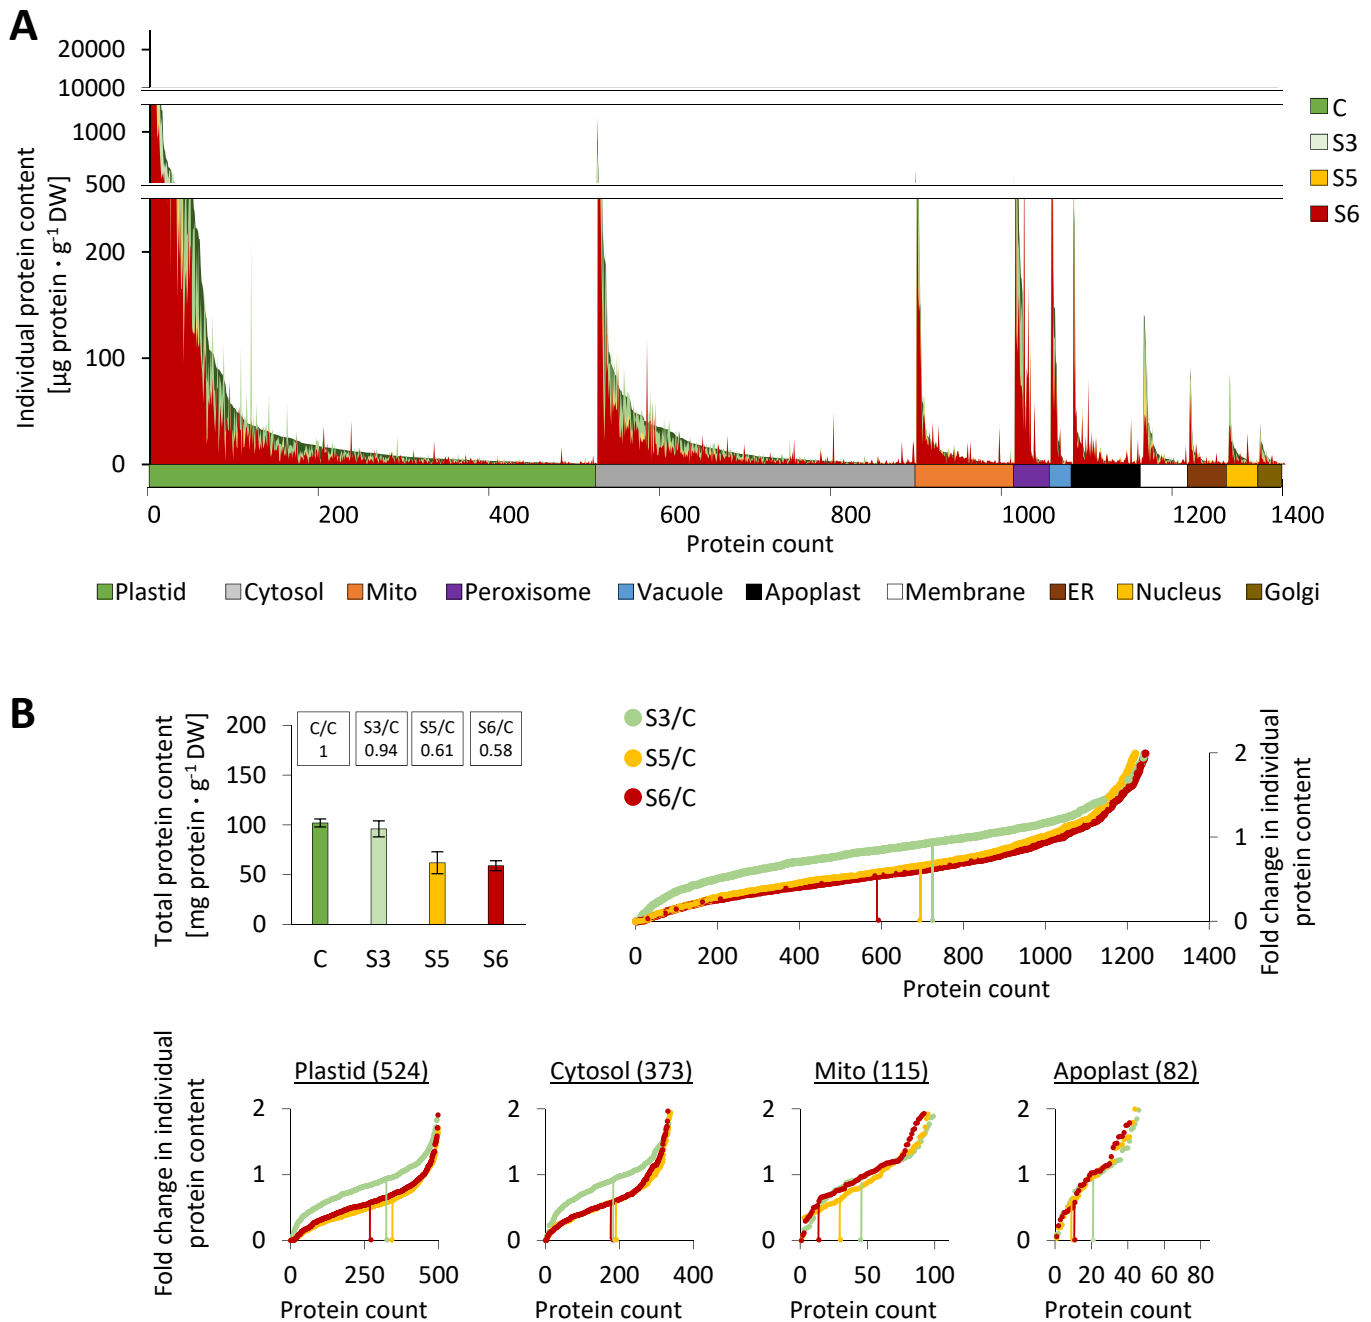

**Fig. 4: Compartment-specific patterns of stress-induced changes in individual protein abundances**

**A.** Absolute contents [ $\mu\text{g protein} \cdot \text{g}^{-1} \text{DW}$ ] of all individual proteins detected by shotgun proteomics in descending order (under control conditions) sorted by subcellular compartments. Protein contents under control and stress conditions are shown in superimposing graphs. **B.** Fold change ratios of total leaf protein as well as individual protein contents in stressed vs. control plants. In order to visualize the fraction of proteins with average, high or low degradation rates, changes in individual protein contents were sorted in ascending order for each stress level. Vertical lines indicate proteins that correspond exactly to the decrease in total protein content, i.e. 0.94 for stress level S3 (light green), 0.61 for S5 (orange), and 0.58 at S6 (red).

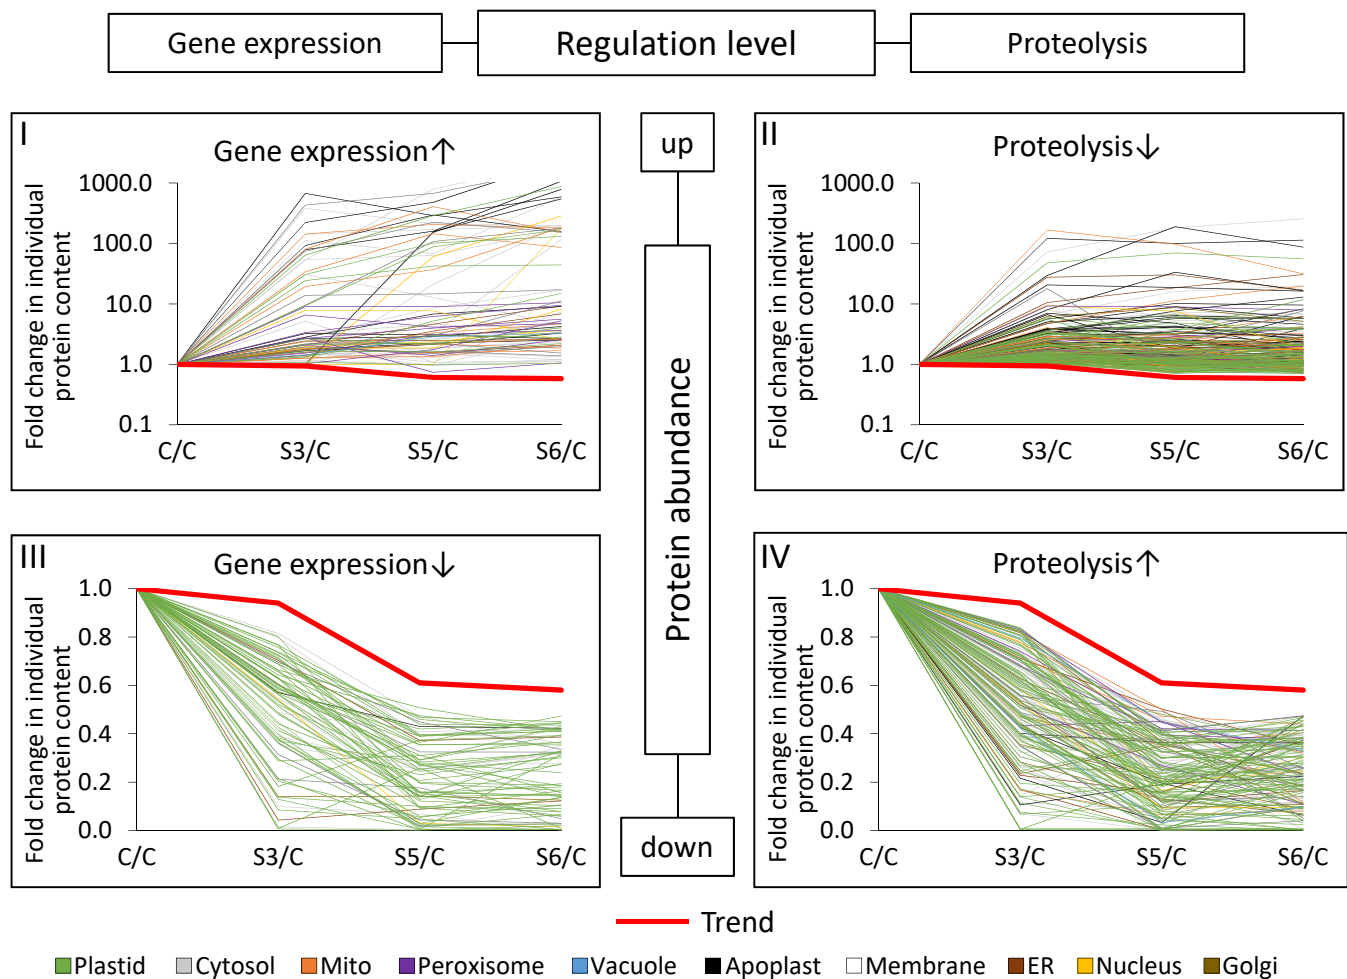

**Fig. 5: Transcriptional and post-translational regulation of protein abundances during progressive drought stress**

Fold change ratios (stress/control) of individual protein contents during progressive drought stress. Red lines in the graphs (Trend) indicate the fold change in total leaf protein content at each stress level (S3/C: 0.94; S5/C: 0.61; S6/C: 0.58). Three microarray datasets available via genevestigator were used to estimate gene expression levels during drought stress (see methods section). The proteomics dataset was filtered for proteins that were of increased relative abundance according to both iBAQ-based and LFQ-based data interpretation at each stress level (more details on the filter criteria are provided in Supp. Dataset S2). These proteins of increased abundance (upper part of the figure) were divided in two groups: proteins with increased gene expression levels according to the microarray datasets (group I, top left) and proteins with unaffected or decreased gene expression levels during drought stress (group II, top right). Proteins of consistently decreased abundance (lower part of the figure) were also filtered for decreased (group III, bottom right) and increased or unaffected expression levels (group IV, bottom left). Colors indicate the subcellular localization of the individual proteins according to SUBA4 (Hooper et al. 2017). Enrichment of compartments and functional categories in the different regulation groups is listed in Table 1.

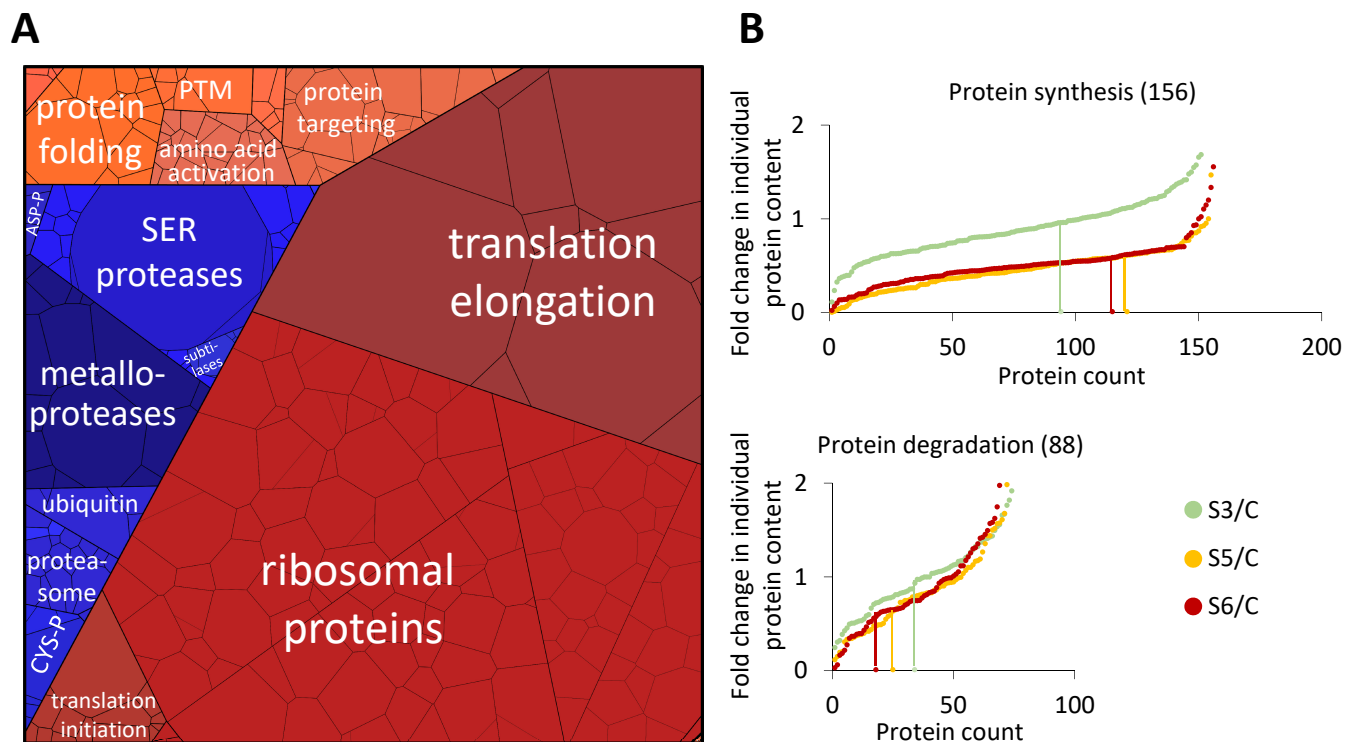

**Fig. 6: Abundance of the proteostasis apparatus during drought stress**

**A.** Proteomap illustrating the quantitative composition of the proteostasis apparatus under control conditions. Proteins are shown as polygons whose sizes represent the mass fractions (protein abundances obtained by mass spectrometry (iBAQ), multiplied by protein molecular weight). Proteins involved in similar cellular functions according to the MapMan annotation file (version Ath\_AGI\_LOCUS\_TAIR10\_Aug2012) are arranged in adjacent locations and visualized by colors. The total protein fraction represented in the Proteomap is  $6.9 \text{ mg} \cdot \text{g}^{-1} \text{ DW}$  corresponding to 6.7 % of the leaf proteome. **B.** Fold change ratios of the individual contents of proteins involved in protein synthesis (top) or proteolysis (bottom) in stressed vs. control plants. In order to visualize the fraction of proteins with average, high or low degradation rates, changes in individual protein contents were sorted in ascending order for each stress level. Vertical lines indicate proteins that correspond exactly to the decrease in total protein content, i.e. 0.94 for stress level S3 (light green), 0.61 for S5 (orange), and 0.58 at S6 (red).



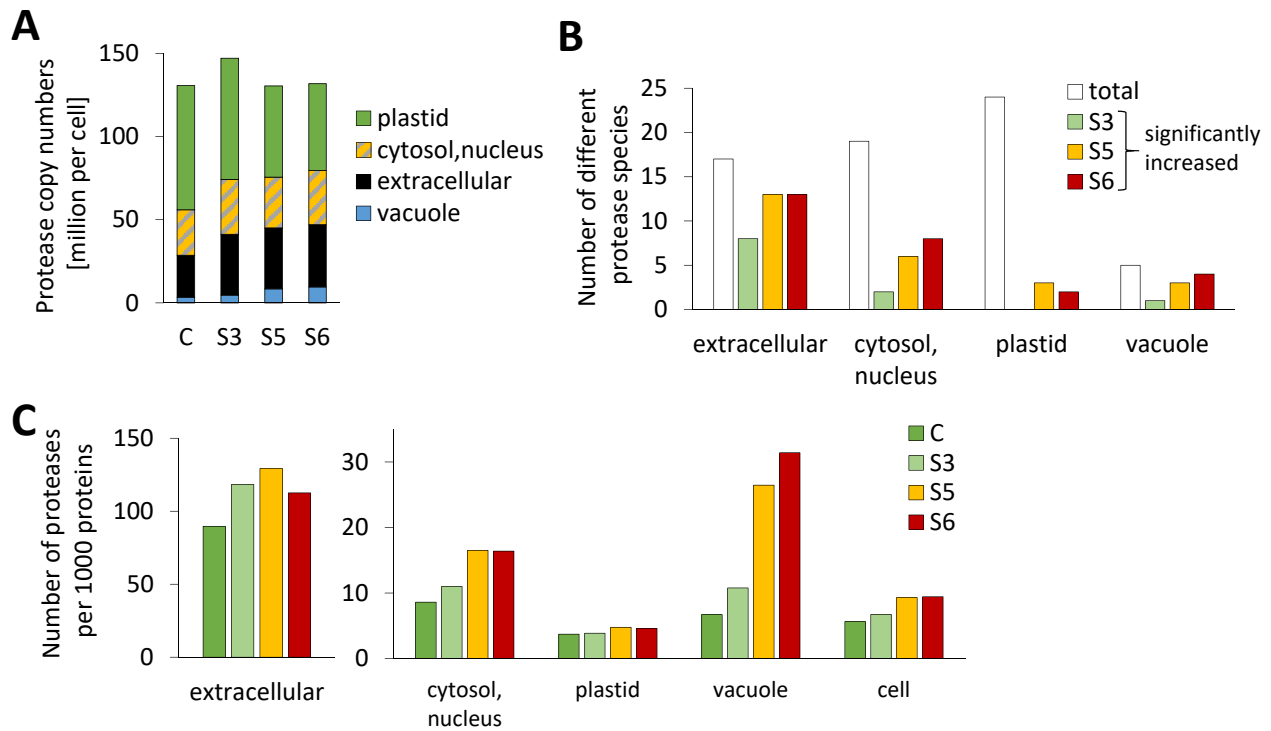

**Fig. 7: Adaptation of the proteolytic apparatus during progressive drought stress**

**A.** Total number and subcellular distribution of protease molecules in an average leaf mesophyll cell under control conditions and during stress. The proteomics dataset (Supp. Dataset S1) was filtered for the MapMan category “protein.degradation” and protein copy numbers of all enzymes with proteolytic activity (without regulatory proteins and inhibitors) were added up for each subcellular compartment individually. **B.** Significant increase in the abundance of individual protease species during drought stress in the different subcellular compartments. White bars indicate the total number of different proteases detected and colored bars illustrate how many of them were significantly increased based on LFQ values at the respective stress level. **C.** Copy numbers of protease molecules per 1000 proteins in the subcellular compartments of an average mesophyll cell under control conditions and during stress. The protease copy numbers shown in A. were divided by the total number of protein molecules in the respective subcellular compartment (Fig. 1E) and multiplied by 1000.

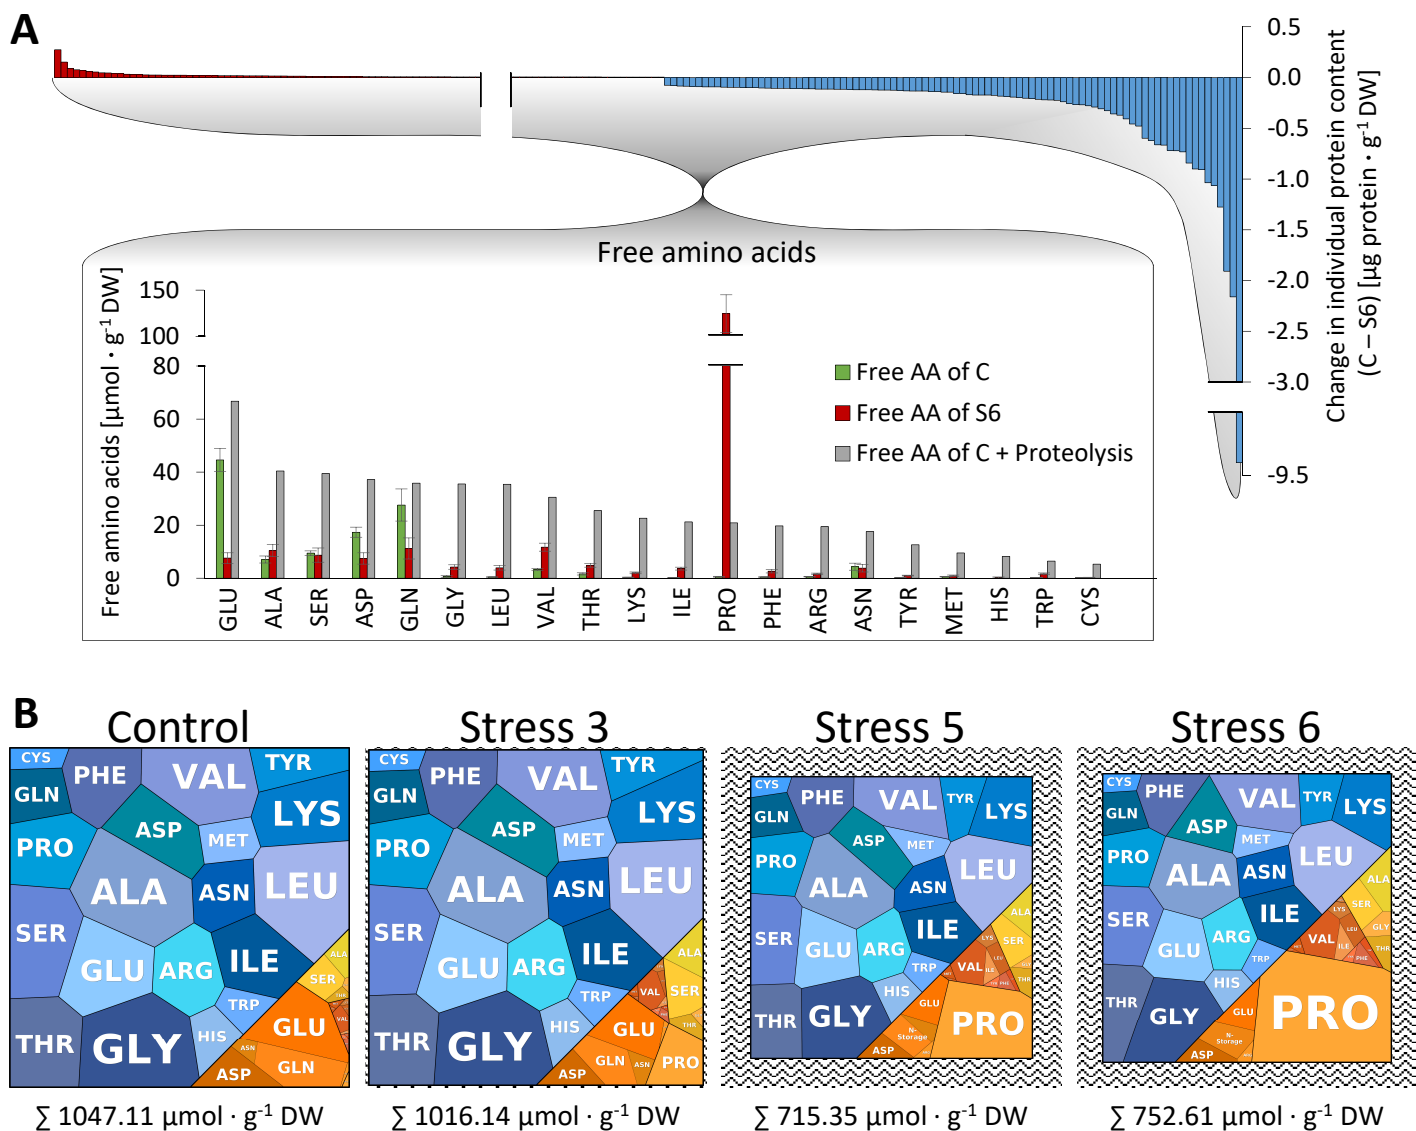

**Fig. 8: Interconnection of amino acid pools during progressive drought stress**

**A.** Effect of proteolysis on free amino acid homeostasis. The quantitative composition of the degraded fraction of the proteome (blue bars) was used to calculate the theoretical composition of the free amino acid pool (grey bars) that would result from massive proteolysis during drought stress (control vs. maximum tolerable stress) without any metabolic conversion of the amino acids produced. **B.** “AMINOmaps” illustrating pool sizes and compositions of the free (orange colors) and protein bound (blue colors) amino acid pools during progressive drought stress. Amino acids are shown as polygons whose sizes represent the molar fractions. Free amino acid contents were quantified by HPLC, and quantitative amino acid composition of the proteome was calculated on the basis of molar composition of the proteome (see Supp. Dataset S1) as detailed in the methods section.

## Parsed Citations

**Alcázar, R., Marco, F., Cuevas, J.C., Patron, M., Ferrando, A., Carrasco, P., Tiburcio, A.F. and Altabella, T. (2006) Involvement of polyamines in plant response to abiotic stress. *Biotechnol Lett*, 28, 1867–1876 doi: 10.1007/s10529-006-9179-3.**

Pubmed: [Author and Title](#)

Google Scholar: [Author Only Title Only Author and Title](#)

**Araújo, W.L., Tohge, T., Ishizaki, K., Leaver, C.J. and Fernie, A.R. (2011) Protein degradation - an alternative respiratory substrate for stressed plants. *Trends Plant Sci*, 16, 489–498 doi: 10.1016/j.tplants.2011.05.008.**

Pubmed: [Author and Title](#)

Google Scholar: [Author Only Title Only Author and Title](#)

**Baerenfaller, K., Grossmann, J., Grobei, M.A., Hull, R., Hirsch-Hoffmann, M., Yalovsky, S., Zimmermann, P., Grossniklaus, U., Gruissem, W. and Baginsky, S. (2008) Genome-scale proteomics reveals *Arabidopsis thaliana* gene models and proteome dynamics. *Science (New York, N.Y.)*, 320, 938–941 doi: 10.1126/science.1157956.**

Pubmed: [Author and Title](#)

Google Scholar: [Author Only Title Only Author and Title](#)

**Balakireva, A.V. and Zamyatnin, A.A. (2018) Indispensable Role of Proteases in Plant Innate Immunity. *International journal of molecular sciences*, 19 doi: 10.3390/ijms19020629.**

Pubmed: [Author and Title](#)

Google Scholar: [Author Only Title Only Author and Title](#)

**Bar-On, Y.M. and Milo, R. (2019) The global mass and average rate of rubisco. *Proceedings of the National Academy of Sciences of the United States of America*, 116, 4738–4743 doi: 10.1073/pnas.1816654116.**

Pubmed: [Author and Title](#)

Google Scholar: [Author Only Title Only Author and Title](#)

**Batista-Silva, W., Heinemann, B., Rugen, N., Nunes-Nesi, A., Araújo, W.L., Braun, H.-P. and Hildebrandt, T.M. (2019) The role of amino acid metabolism during abiotic stress release. *Plant, cell & environment*, 42, 1630–1644 doi: 10.1111/pce.13518.**

Pubmed: [Author and Title](#)

Google Scholar: [Author Only Title Only Author and Title](#)

**Berger, D. and Altmann, T. (2000) A subtilisin-like serine protease involved in the regulation of stomatal density and distribution in *Arabidopsis thaliana*. *Genes Dev.*, 14, 1119–1131 doi: 10.1101/gad.14.9.1119.**

Pubmed: [Author and Title](#)

Google Scholar: [Author Only Title Only Author and Title](#)

**Bradford, M.M. (1976) A rapid and sensitive method for the quantitation of microgram quantities of protein utilizing the principle of protein-dye binding. *Analytical Biochemistry*, 72, 248–254 doi: 10.1016/0003-2697(76)90527-3.**

Pubmed: [Author and Title](#)

Google Scholar: [Author Only Title Only Author and Title](#)

**Chrobok, D., Law, S.R., Brouwer, B., Lindén, P., Ziolkowska, A., Liebsch, D., Narsai, R., Szal, B., Moritz, T., Rouhier, N., Whelan, J., Gardeström, P. and Keech, O. (2016) Dissecting the Metabolic Role of Mitochondria during Developmental Leaf Senescence. *Plant physiology*, 172, 2132–2153 doi: 10.1104/pp.16.01463.**

Pubmed: [Author and Title](#)

Google Scholar: [Author Only Title Only Author and Title](#)

**Cox, J., Hein, M.Y., Lubner, C.A., Paron, I., Nagaraj, N. and Mann, M. (2014) Accurate proteome-wide label-free quantification by delayed normalization and maximal peptide ratio extraction, termed MaxLFQ. *Molecular & cellular proteomics : MCP*, 13, 2513–2526 doi: 10.1074/mcp.M113.031591.**

Pubmed: [Author and Title](#)

Google Scholar: [Author Only Title Only Author and Title](#)

**Cox, J. and Mann, M. (2008) MaxQuant enables high peptide identification rates, individualized p.p.b.-range mass accuracies and proteome-wide protein quantification. *Nat Biotechnol*, 26, 1367–1372 doi: 10.1038/nbt.1511.**

Pubmed: [Author and Title](#)

Google Scholar: [Author Only Title Only Author and Title](#)

**Dikic, I. (2017) Proteasomal and Autophagic Degradation Systems. *Annual review of biochemistry*, 86, 193–224 doi: 10.1146/annurev-biochem-061516-044908.**

Pubmed: [Author and Title](#)

Google Scholar: [Author Only Title Only Author and Title](#)

**Engineer, C.B., Ghassseman, M., Anderson, J.C., Peck, S.C., Hu, H. and Schroeder, J.I. (2014) Carbonic anhydrases, EPF2 and a novel protease mediate CO<sub>2</sub> control of stomatal development. *Nature*, 513, 246–250 doi: 10.1038/nature13452.**

Pubmed: [Author and Title](#)

Google Scholar: [Author Only Title Only Author and Title](#)

**Fabre, B., Lambour, T., Bouyssié, D., Menneteau, T., Monsarrat, B., Burlet-Schiltz, O. and Bousquet-Dubouch, M.-P. (2014) Comparison of label-free quantification methods for the determination of protein complexes subunits stoichiometry. *EuPA Open Proteomics*, 4, 82–86 doi: 10.1016/j.euprot.2014.06.001.**



Pubmed: [Author and Title](#)

Google Scholar: [Author Only Title Only Author and Title](#)

**Fahey, R.C., Newton, G.L., Dorian, R. and Kosower, E.M. (1980) Analysis of biological thiols: Derivatization with monobromotrimethylammoniumbimane and characterization by electrophoresis and chromatography. Analytical Biochemistry, 107, 1–10 doi: 10.1016/0003-2697(80)90483-2.**

Pubmed: [Author and Title](#)

Google Scholar: [Author Only Title Only Author and Title](#)

**Fernie, A.R., Roscher, A., Ratcliffe, R.G. and Kruger, N.J. (2001) Fructose 2,6-bisphosphate activates pyrophosphate: fructose-6-phosphate 1-phosphotransferase and increases triose phosphate to hexose phosphate cycling in heterotrophic cells. Planta, 212, 250–263 doi: 10.1007/s004250000386.**

Pubmed: [Author and Title](#)

Google Scholar: [Author Only Title Only Author and Title](#)

**Floyd, B.E., Morriss, S.C., MacIntosh, G.C. and Bassham, D.C. (2016) Evidence for autophagy-dependent pathways of rRNA turnover in Arabidopsis. Autophagy, 11, 2199–2212 doi: 10.1080/15548627.2015.1106664.**

Pubmed: [Author and Title](#)

Google Scholar: [Author Only Title Only Author and Title](#)

**Fuchs, P., Rugen, N., Carrie, C., Elsässer, M., Finkemeier, I., Giese, J., Hildebrandt, T.M., Kühn, K., Maurino, V.G., Ruberti, C., Schallenberg-Rüdinger, M., Steinbeck, J., Braun, H.-P., Eubel, H., Meyer, E.H., Müller-Schüssele, S.J. and Schwarzländer, M. (2020) Single organelle function and organization as estimated from Arabidopsis mitochondrial proteomics. The Plant journal : for cell and molecular biology, 101, 420–441 doi: 10.1111/tpj.14534.**

Pubmed: [Author and Title](#)

Google Scholar: [Author Only Title Only Author and Title](#)

**Hildebrandt, T.M. (2018) Synthesis versus degradation: directions of amino acid metabolism during Arabidopsis abiotic stress response. Plant molecular biology, 98, 121–135 doi: 10.1007/s11103-018-0767-0.**

Pubmed: [Author and Title](#)

Google Scholar: [Author Only Title Only Author and Title](#)

**Hildebrandt, T.M., Nunes Nesi, A., Araújo, W.L. and Braun, H.-P. (2015) Amino Acid Catabolism in Plants. Molecular plant, 8, 1563–1579 doi: 10.1016/j.molp.2015.09.005.**

Pubmed: [Author and Title](#)

Google Scholar: [Author Only Title Only Author and Title](#)

**Ho, B., Baryshnikova, A and Brown, G.W. (2018) Unification of Protein Abundance Datasets Yields a Quantitative Saccharomyces cerevisiae Proteome. Cell systems, 6, 192-205.e3 doi: 10.1016/j.cels.2017.12.004.**

Pubmed: [Author and Title](#)

Google Scholar: [Author Only Title Only Author and Title](#)

**Hooper, C.M., Castleden, I.R., Tanz, S.K., Aryamanesh, N. and Millar, A.H. (2017) SUBA4: the interactive data analysis centre for Arabidopsis subcellular protein locations. Nucleic acids research, 45, D1064-D1074 doi: 10.1093/nar/gkw1041.**

Pubmed: [Author and Title](#)

Google Scholar: [Author Only Title Only Author and Title](#)

**Hruz, T., Laule, O., Szabo, G., Wessendorp, F., Bleuler, S., Oertle, L., Widmayer, P., Gruissem, W. and Zimmermann, P. (2008) Genevestigator v3: a reference expression database for the meta-analysis of transcriptomes. Adv Bioinformatics, 2008, 420747 doi: 10.1155/2008/420747.**

Pubmed: [Author and Title](#)

Google Scholar: [Author Only Title Only Author and Title](#)

**Jorgensen, P., Nishikawa, J.L., Breitskreutz, B.-J. and Tyers, M. (2002) Systematic identification of pathways that couple cell growth and division in yeast. Science (New York, N.Y.), 297, 395–400 doi: 10.1126/science.1070850.**

Pubmed: [Author and Title](#)

Google Scholar: [Author Only Title Only Author and Title](#)

**Julia Mergner, Martin Frejno, Markus List, Michael Papacek, Xia Chen, Ajeet Chaudhary, Patroklos Samaras, Sandra Richter, Hiromasa Shikata, Maxim Messerer, Daniel Lang, Stefan Altmann, Philipp Cyprys, Daniel P. Zolg, Toby Mathieson, Marcus Bantscheff, Rashmi R. Hazarika, Tobias Schmidt, Corinna Dawid, Andreas Dunkel, Thomas Hofmann, Stefanie Sprunck, Pascal Falter-Braun, Frank Johannes, Klaus F. X. Mayer, Gerd Jürgens, Mathias Wilhelm, Jan Baumbach, Erwin Grill, Kay Schneitz, Claus Schwechheimer and Bernhard Kuster (2020) Mass-spectrometry-based draft of the Arabidopsis proteome. Nature, 1–6 doi: 10.1038/s41586-020-2094-2.**

Pubmed: [Author and Title](#)

Google Scholar: [Author Only Title Only Author and Title](#)

**Klodmann, J., Sunderhaus, S., Nimtz, M., Jansch, L. and Braun, H.-P. (2010) Internal architecture of mitochondrial complex I from Arabidopsis thaliana. The Plant cell, 22, 797–810 doi: 10.1105/tpc.109.073726.**

Pubmed: [Author and Title](#)

Google Scholar: [Author Only Title Only Author and Title](#)

**Königer, M., Delamaide, J.A, Marlow, E.D. and Harris, G.C. (2008) Arabidopsis thaliana leaves with altered chloroplast numbers and chloroplast movement exhibit impaired adjustments to both low and high light. J Exp Bot, 59, 2285–2297 doi: 10.1093/jxb/ern099.**

Pubmed: [Author and Title](#)

Google Scholar: [Author Only](#) [Title Only](#) [Author and Title](#)

**Krasensky, J. and Jonak, C. (2012) Drought, salt, and temperature stress-induced metabolic rearrangements and regulatory networks. *J Exp Bot*, 63, 1593–1608 doi: 10.1093/jxb/err460.**

Pubmed: [Author and Title](#)

Google Scholar: [Author Only](#) [Title Only](#) [Author and Title](#)

**Krey, J.F., Wilmarth, P.A., Shin, J.-B., Klimek, J., Sherman, N.E., Jeffery, E.D., Choi, D., David, L.L. and Barr-Gillespie, P.G. (2013) Accurate Label-Free Protein Quantitation with High- and Low-Resolution Mass Spectrometers. *Journal of proteome research*, 13, 1034–1044 doi: 10.1021/pr401017h.**

Pubmed: [Author and Title](#)

Google Scholar: [Author Only](#) [Title Only](#) [Author and Title](#)

**Kulak, N.A., Pichler, G., Paron, I., Nagaraj, N. and Mann, M. (2014) Minimal, encapsulated proteomic-sample processing applied to copy-number estimation in eukaryotic cells. *Nature methods*, 11, 319–324 doi: 10.1038/nmeth.2834.**

Pubmed: [Author and Title](#)

Google Scholar: [Author Only](#) [Title Only](#) [Author and Title](#)

**Kwasniak, M., Pogorzelec, L., Migdal, I., Smakowska, E. and Janska, H. (2012) Proteolytic system of plant mitochondria. *Physiologia Plantarum*, 145, 187–195 doi: 10.1111/j.1399-3054.2011.01542.x.**

Pubmed: [Author and Title](#)

Google Scholar: [Author Only](#) [Title Only](#) [Author and Title](#)

**Lam, H.-M., Wong, P., Chan, H.-K., Yam, K.-M., Chen, L., Chow, C.-M. and Coruzzi, G.M. (2003) Overexpression of the ASN1 gene enhances nitrogen status in seeds of *Arabidopsis*. *Plant physiology*, 132, 926–935 doi: 10.1104/pp.103.020123.**

Pubmed: [Author and Title](#)

Google Scholar: [Author Only](#) [Title Only](#) [Author and Title](#)

**Li, L., Nelson, C.J., Trösch, J., Castleden, I., Huang, S. and Millar, A.H. (2017) Protein Degradation Rate in *Arabidopsis thaliana* Leaf Growth and Development. *Plant Cell*, 29, 207–228 doi: 10.1105/tpc.16.00768.**

Pubmed: [Author and Title](#)

Google Scholar: [Author Only](#) [Title Only](#) [Author and Title](#)

**Liebermeister, W., Noor, E., Flammholz, A., Davidi, D., Bernhardt, J. and Milo, R. (2014) Visual account of protein investment in cellular functions. *Proceedings of the National Academy of Sciences of the United States of America*, 111, 8488–8493 doi: 10.1073/pnas.1314810111.**

Pubmed: [Author and Title](#)

Google Scholar: [Author Only](#) [Title Only](#) [Author and Title](#)

**Ludwików, A., Kierzek, D., Gallois, P., Zeef, L. and Sadowski, J. (2009) Gene expression profiling of ozone-treated *Arabidopsis abi1td* insertional mutant: protein phosphatase 2C AB11 modulates biosynthesis ratio of ABA and ethylene. *Planta*, 230, 1003–1017 doi: 10.1007/s00425-009-1001-8.**

Pubmed: [Author and Title](#)

Google Scholar: [Author Only](#) [Title Only](#) [Author and Title](#)

**Marshall, R.S. and Vierstra, R.D. (2018) Autophagy: The Master of Bulk and Selective Recycling. *Annual review of plant biology*, 69, 173–208 doi: 10.1146/annurev-arplant-042817-040606.**

Pubmed: [Author and Title](#)

Google Scholar: [Author Only](#) [Title Only](#) [Author and Title](#)

**McClellan, A.J., Tam, S., Kaganovich, D. and Frydman, J. (2005) Protein quality control: chaperones culling corrupt conformations. *Nat Cell Biol*, 7, 736–741 doi: 10.1038/ncb0805-736.**

Pubmed: [Author and Title](#)

Google Scholar: [Author Only](#) [Title Only](#) [Author and Title](#)

**Merchante, C., Stepanova, A.N. and Alonso, J.M. (2017) Translation regulation in plants: an interesting past, an exciting present and a promising future. *The Plant journal : for cell and molecular biology*, 90, 628–653 doi: 10.1111/tpj.13520.**

Pubmed: [Author and Title](#)

Google Scholar: [Author Only](#) [Title Only](#) [Author and Title](#)

**Michaeli, S. and Galili, G. (2014) Degradation of Organelles or Specific Organelle Components via Selective Autophagy in Plant Cells. *International journal of molecular sciences*, 15, 7624–7638 doi: 10.3390/ijms15057624.**

Pubmed: [Author and Title](#)

Google Scholar: [Author Only](#) [Title Only](#) [Author and Title](#)

**Nelson, C.J. and Millar, A.H. (2015) Protein turnover in plant biology. *Nature plants*, 1, 15017 doi: 10.1038/nplants.2015.17.**

Pubmed: [Author and Title](#)

Google Scholar: [Author Only](#) [Title Only](#) [Author and Title](#)

**Neuhoff, V., Stamm, R. and Eibl, H. (1985) Clear background and highly sensitive protein staining with Coomassie Blue dyes in polyacrylamide gels: A systematic analysis. *Electrophoresis*, 6, 427–448 doi: 10.1002/elps.1150060905.**

Pubmed: [Author and Title](#)

Google Scholar: [Author Only](#) [Title Only](#) [Author and Title](#)

**Newton, G.L., Dorian, R. and Fahey, R.C. (1981) Analysis of biological thiols: Derivatization with monobromobimane and separation by**

**reverse-phase high-performance liquid chromatography.** *Analytical Biochemistry*, 114, 383–387 doi: 10.1016/0003-2697(81)90498-X.

Pubmed: [Author and Title](#)

Google Scholar: [Author Only Title Only Author and Title](#)

**Nishimura, K., Kato, Y. and Sakamoto, W. (2016) Chloroplast Proteases: Updates on Proteolysis within and across Suborganellar Compartments.** *Plant physiology*, 171, 2280–2293 doi: 10.1104/pp.16.00330.

Pubmed: [Author and Title](#)

Google Scholar: [Author Only Title Only Author and Title](#)

**O'Leary, B.M., Lee, C.P., Atkin, O.K., Cheng, R., Brown, T.B. and Millar, A.H. (2017) Variation in Leaf Respiration Rates at Night Correlates with Carbohydrate and Amino Acid Supply.** *Plant physiology*, 174, 2261–2273 doi: 10.1104/pp.17.00610.

Pubmed: [Author and Title](#)

Google Scholar: [Author Only Title Only Author and Title](#)

**Pandey, N., Ranjan, A., Pant, P., Tripathi, R.K., Ateek, F., Pandey, H.P., Patre, U.V. and Sawant, S.V. (2013) CAMTA 1 regulates drought responses in *Arabidopsis thaliana*.** *BMC genomics*, 14, 216 doi: 10.1186/1471-2164-14-216.

Pubmed: [Author and Title](#)

Google Scholar: [Author Only Title Only Author and Title](#)

**Perera, I.Y., Hung, C.-Y., Moore, C.D., Stevenson-Paulik, J. and Boss, W.F. (2008) Transgenic *Arabidopsis* plants expressing the type 1 inositol 5-phosphatase exhibit increased drought tolerance and altered abscisic acid signaling.** *Plant Cell*, 20, 2876–2893 doi: 10.1105/tpc.108.061374.

Pubmed: [Author and Title](#)

Google Scholar: [Author Only Title Only Author and Title](#)

**Pinheiro, C. and Chaves, M.M. (2011) Photosynthesis and drought: can we make metabolic connections from available data?** *J Exp Bot*, 62, 869–882 doi: 10.1093/jxb/erq340.

Pubmed: [Author and Title](#)

Google Scholar: [Author Only Title Only Author and Title](#)

**Pottosin, I. and Shabala, S. (2016) Transport Across Chloroplast Membranes: Optimizing Photosynthesis for Adverse Environmental Conditions.** *Molecular plant*, 9, 356–370 doi: 10.1016/j.molp.2015.10.006.

Pubmed: [Author and Title](#)

Google Scholar: [Author Only Title Only Author and Title](#)

**Preuten, T., Cincu, E., Fuchs, J., Zoschke, R., Liere, K. and Börner, T. (2010) Fewer genes than organelles: extremely low and variable gene copy numbers in mitochondria of somatic plant cells.** *The Plant journal : for cell and molecular biology*, 64, 948–959 doi: 10.1111/j.1365-313X.2010.04389.x.

Pubmed: [Author and Title](#)

Google Scholar: [Author Only Title Only Author and Title](#)

**Schikowsky, C., Senkler, J. and Braun, H.-P. (2017) SDH6 and SDH7 Contribute to Anchoring Succinate Dehydrogenase to the Inner Mitochondrial Membrane in *Arabidopsis thaliana*.** *Plant physiology*, 173, 1094–1108 doi: 10.1104/pp.16.01675.

Pubmed: [Author and Title](#)

Google Scholar: [Author Only Title Only Author and Title](#)

**Schwanhäusser, B., Busse, D., Li, N., Dittmar, G., Schuchhardt, J., Wolf, J., Chen, W. and Selbach, M. (2011) Global quantification of mammalian gene expression control.** *Nature*, 473, 337–342 doi: 10.1038/nature10098.

Pubmed: [Author and Title](#)

Google Scholar: [Author Only Title Only Author and Title](#)

**Smart, R.E. (1974) Rapid estimates of relative water content.** *Plant physiology*, 53, 258–260 doi: 10.1104/pp.53.2.258.

Pubmed: [Author and Title](#)

Google Scholar: [Author Only Title Only Author and Title](#)

**Stührwoldt, N. and Schaller, A. (2019) Regulation of plant peptide hormones and growth factors by post-translational modification.** *Plant biology (Stuttgart, Germany)*, 21 Suppl 1, 49–63 doi: 10.1111/plb.12881.

Pubmed: [Author and Title](#)

Google Scholar: [Author Only Title Only Author and Title](#)

**Suraweera, A., Münch, C., Hanssum, A. and Bertolotti, A. (2012) Failure of amino acid homeostasis causes cell death following proteasome inhibition.** *Molecular cell*, 48, 242–253 doi: 10.1016/j.molcel.2012.08.003.

Pubmed: [Author and Title](#)

Google Scholar: [Author Only Title Only Author and Title](#)

**Szabados, L. and Savouré, A. (2010) Proline: a multifunctional amino acid.** *Trends Plant Sci*, 15, 89–97 doi: 10.1016/j.tplants.2009.11.009.

Pubmed: [Author and Title](#)

Google Scholar: [Author Only Title Only Author and Title](#)

**Thimm, O., Bläsing, O., Gibon, Y., Nagel, A., Meyer, S., Krüger, P., Selbig, J., Müller, L.A., Rhee, S.Y. and Stitt, M. (2004) MAPMAN: a user-driven tool to display genomics data sets onto diagrams of metabolic pathways and other biological processes.** *The Plant journal : for cell and molecular biology*, 37, 914–939 doi: 10.1111/j.1365-313x.2004.02016.x.

Pubmed: [Author and Title](#)

Google Scholar: [Author Only Title Only Author and Title](#)

**Tyanova, S., Temu, T., Sinitcyn, P., Carlson, A., Hein, M.Y., Geiger, T., Mann, M. and Cox, J. (2016) The Perseus computational platform for comprehensive analysis of (prote)omics data. Nat Methods, 13, 731–740 doi: 10.1038/nmeth.3901.**

Pubmed: [Author and Title](#)

Google Scholar: [Author Only](#) [Title Only](#) [Author and Title](#)

**Tzin, V. and Galili, G. (2010) New insights into the shikimate and aromatic amino acids biosynthesis pathways in plants. Mol Plant, 3, 956–972 doi: 10.1093/mp/ssp048.**

Pubmed: [Author and Title](#)

Google Scholar: [Author Only](#) [Title Only](#) [Author and Title](#)

**van der Hoorn, R.A.L. (2008) Plant proteases: from phenotypes to molecular mechanisms. Annual review of plant biology, 59, 191–223 doi: 10.1146/annurev.arplant.59.032607.092835.**

Pubmed: [Author and Title](#)

Google Scholar: [Author Only](#) [Title Only](#) [Author and Title](#)

**Vierstra, R.D. (2009) The ubiquitin-26S proteasome system at the nexus of plant biology. Nature reviews. Molecular cell biology, 10, 385–397 doi: 10.1038/nrm2688.**

Pubmed: [Author and Title](#)

Google Scholar: [Author Only](#) [Title Only](#) [Author and Title](#)

**Wang, Q., Guo, Q., Guo, Y., Yang, J., Wang, M., Duan, X., Niu, J., Liu, S., Zhang, J., Lu, Y., Hou, Z., Miao, W., Wang, X., Kong, W., Xu, X., Wu, Y., Rui, Q. and La, H. (2018) Arabidopsis subtilase SASP is involved in the regulation of ABA signaling and drought tolerance by interacting with OPEN STOMATA 1. Journal of Experimental Botany, 69, 4403–4417 doi: 10.1093/jxb/ery205.**

Pubmed: [Author and Title](#)

Google Scholar: [Author Only](#) [Title Only](#) [Author and Title](#)

**Wiesenthal, A.A., Müller, C., Harder, K. and Hildebrandt, J.-P. (2019) Alanine, proline and urea are major organic osmolytes in the snail *Theodoxus fluviatilis* under hyperosmotic stress. The Journal of experimental biology, 222 doi: 10.1242/jeb.193557.**

Pubmed: [Author and Title](#)

Google Scholar: [Author Only](#) [Title Only](#) [Author and Title](#)

**Wuyts, N., Palauqui, J.-C., Conejero, G., Verdeil, J.-L., Granier, C. and Massonnet, C. (2010) High-contrast three-dimensional imaging of the *Arabidopsis* leaf enables the analysis of cell dimensions in the epidermis and mesophyll. Plant Methods, 6, 1–14 doi: 10.1186/1746-4811-6-17.**

Pubmed: [Author and Title](#)

Google Scholar: [Author Only](#) [Title Only](#) [Author and Title](#)
